# Supplementary material for: A Genomic Approach to Examine the Complex Evolution of Laurasiatherian Mammals
Source: PubMed Central journal article supplement (PMC3229520; doi:10.1371/journal.pone.0028199), 2011-12-02

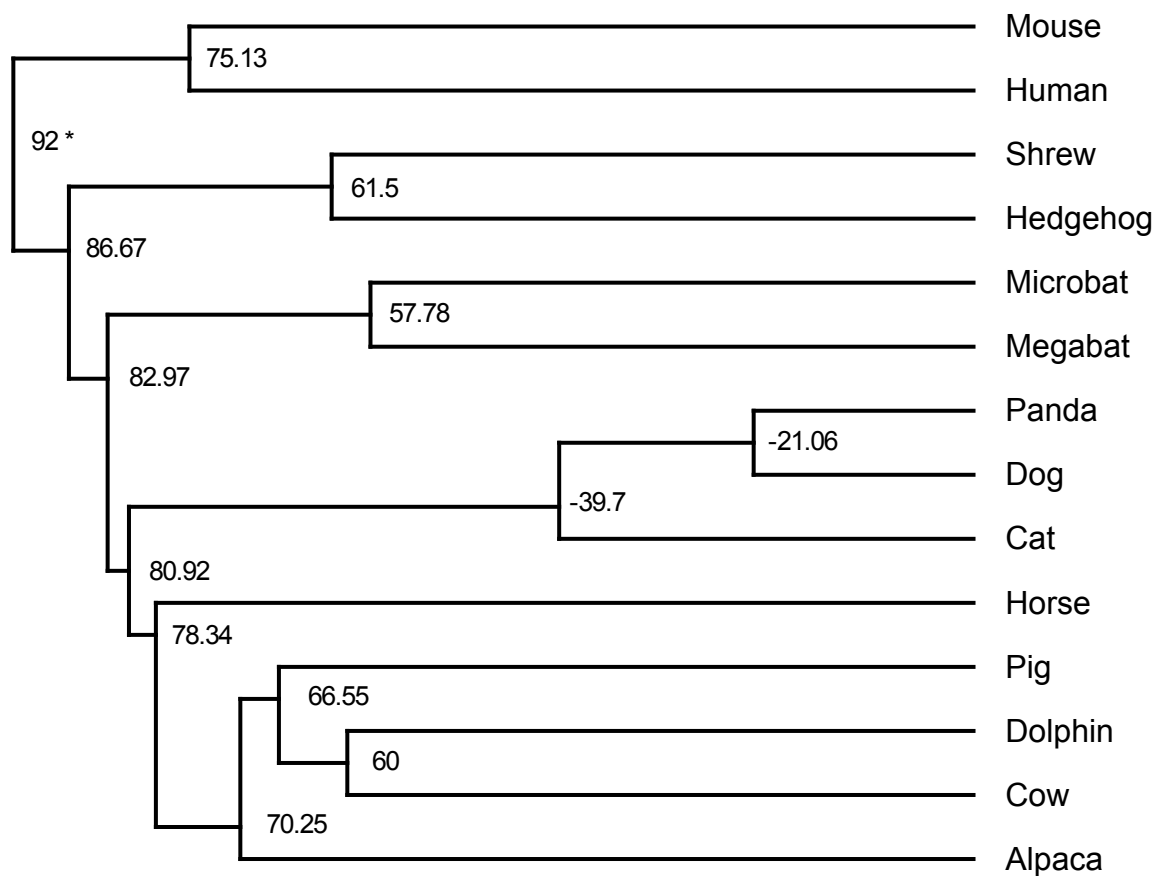

Supplement: pone.0028199.s001.pdf [file pone.0028199.s001.pdf]
