# Supplementary material for: A Genomic Approach to Examine the Complex Evolution of Laurasiatherian Mammals
Source: PubMed Central journal article supplement (PMC3229520; doi:10.1371/journal.pone.0028199), 2011-12-02
Supplement: pone.0028199.s002.pdf [file pone.0028199.s002.pdf]

# Laurasiatheria monophyly

## B-2016 L1MC1

```
cow      GTGTC AATATTTTGC -TATTTTCTCACTTTTTACGTATTTT-----TTTTTCAGAGCAGTTTTAGATCTACAAC--ATTGGGAGGGAGTTACAGAGATTTCCATATA-CCCTTACCCTCACAAATGCATAGCCT-CCTCACTATTG-----ACCAAAGAT
dog      ATATCAATATTTTGTATTTTTTCACTCTTTAT-----TTTTAA-----AGA TTTTACITTTTGGAGCAGTTTTAGGTCTACAACAAAATG-GAGGGACATTTAGATATTTCCCATATACCCTGTCTCCACACATGCATAGCCT----ATTATCA-----ACCAAGGAT
bat      GTATCAATATTTTCTTATTTTTTAC-TTTTATACATTTTTAC TTTTAA-----AGAA TTT-CITTTTAGTG CAG TTTTAGGTTTACAACAAAT TGGGAGGGAGGTACAAAATATTTCCACATAACCCCTCTCTCCACACATGCATAGCCT-TCTCATTTGTTA-----ACTAAGAA
horse    AAATCAATATTTTGTATTTTCTTACATTTTTATTTATTTTTATTTTAA-----AGACAAT-TTTTTAGACAAGTTTTAGGTTTACAACAAAAT TGGAGGGGAAATACAGAGATTTCCCATATACCCTTACCTCCCTCACATGCATAACCTACCCCATATCA-----ATCAAGGAT
shrew    ATTTCTGCCITTTTACCAATTTTTCTCCGTTTCCCTCTTTTTCACTTCTGCTCTAGTAACCAATGTGTCTGATATTTATCTCAAGAGTTTAAAGATTTTTTTGCTTTGTGTTTAGGTTTACATATAAGTG--AAATCATACAGTGTTTACAACATCTGACTTGTACTGGATTTATAGAACCTAACAAACCAATAGAAAAAG...TAAAAACAGTAAAGAA
human    ATATCAAAATTTTGTATTTT-----
```

```
cow      AAACCTACACTAACACCAATGATCCCCAAA-----TTCACTCAGTGTTCGCATTCTATGGG-----TTTGGACAAATGTGTAATAACATATACCTTAGTTATAAGGGTATCACATAGAATATTTTCACTGACCTA-AAAACTCCTCTGTCTCTG-CCTTATTTTGCTTATTTTTTTTTTTA--ATTTTTAGGTAGATATGCAAC
dog      GAACCTACATTAAACAAATCATAACCCCAAAAGTCCATAGTTTACTTTAGGGTTCACTTGGTGTGTACATTTTTATGGG-----TTTGGACAAATGTGTAATGACATATAACTATCATTACA--GTATCATAGAGAATATTTTCACTGCCCT--AAAACTGCAATGCCCTA-CITTTATTTTTCTTATTTTTTAACTTA--ACTTTTTAGGTAAATAGGCAGC
bat      GAATCTATATTGACATGT CATAAATCAATCAAAAGTTCATAAATTTACCCTGGGGTTCACTCAGTGTGTACATTTCTATGGG-----TTTGGACAAATGTATGGTGACATGATCCATATTACA--ATATCATATAGAGATTTTTCACTGCTCTA-AAAACTCCTCTTGTCTCTC-CCTCATCTTGTTTATTTTTTAACTTC--ACTTTTTAGGTACATATGCAGC
horse    GAACCTACATTGACACATCATTATACCCCAAGTCCITTTGTTTACCCTTAGGGTTCACTCAGTGTGTACGTTCTATGGG-----TTTGGACAAATGTATAATAACACATAGCCATCATTATA--TTATCACACAGAGTCTTTCACTGCCCTA-AAAACTCCTCCTGCTCTG-CCTTATTTTGTTTATTTTTTAACTTA--ACTTTTTAGGTAGATATGCAGC
shrew    AATCCTACATTAATGCATACCCGTGACCTAAACCACTA--TTACCTCAGTATTTGCTTGATGCTGTGATTTGATGTGTGGGTTTACATCGGAATGAATTAGGACAAATGTGATTGTTTACAAA--CTGTCTATGGAGTATTTTTATTACCTTAGAAGAAATGCTATCTCTGCATTTTTGTGCTAATTTTTTAACTTAACATTTTTTAGGTAAATATGCAGC
human    -----AA--ACTTCTAGGTAAATACAG
```

```
cow      CTAAATTTTGAACAACATCTATATGTATTGTTACTTTATTGACTTTATTATCATTGGATTATTTCTT
dog      CTAAATTTTGAAGACAACATCTACATGTATTGTTACTTTTCAACTTTGTTATTATGGATTATTTCTT
bat      CTGAATTTTGAAGTGAATATCTACATGTATTGTTACTTTATTGGTTTTATTATCATTGGATTATTTCTT
horse    CTAAATTTTGAAGGCAATATCTACATGTATTGTTACTTTTACAGCTTCAATATCATCGGATTATTTCTT
shrew    CTATCTTTTGAAGTCAACTGTATATGTATTGTTACTTTTATCCTTTCAATATTTGATTATTTTCTT
human    CTCAATTTTGAAGTCAACATCTACATGTATTGTTACTTTTCAACTTTATTAATTTTGGAGTATTTCTT
```

## B-3137 L1MA9

```
cow      CACCTATAATAGGACTCTTTTC-----TTTAGATGACTACTAGGTATCATAA-CCACCAAGGGGAA-----TAACATTTGCTTTATCAGATTTCTAACTTTTGGTTTCTTCAAGGGCCAA-----GTGAGAAAATAATAAAAATAATAC-GTTTATATAACTGAAATTTGCTAAGAGAGTATAACTTAAATTTTTCCCAATAAAAGTTAAACCTGTTTTTTT
bat      CACCGTTTTAAGGATTCTTTCC-----TCTAGATGACTTCTAGATAGCACAA-CCACCTGGCAAAATAAATAACATTTGTTCTTACAGATTTCTAAATTTTTGGTTTCTTCAAGGGCAAAAGAGTAAAGAAA-AACTAAAAATAACTGTTTGAAGAAATGAAATTTGCTAAGAGAGTAAATTTAAATGTTCTCACCAAAAAAAGTTAAATAA-CTGTTT
horse    CACCGTTTGAAGGACTCTTTCC-----TCTAGGTAAGTACTAGG-AGCATAA-CCACTGGGAAATAAATAACATTTGTTACTTACAGATTTCTAAATTTTTGGTTTCTTCAAGGGCAAAAGAGTAAAGAAAATAAATAACTGTTTGTATATAATGAAATTTGCTAAGAGAGTAAATGTTCTCACCAAAAAAATA-----CTGTTT
dog      CATCTGTTTACAGGACTCTATCC-----TCCAGGAGACTGCTAGGTAGCTTAA-CTACTATAGGAAAAGAAATGATAATCATCTTTATCAGATTTCTAAATTTTTGGTTTCTTCAAGGGCAAAAGAGTAAAGAAA-----AAAACTGGTACTTTTGTATATTGAAA-TTGCTAAGAGAGTAAAGTCTTAAATTTTCTCACCAAAAAAAGTAAAAATAA-CTGTTT
hedgehog CACCTACTAATGACTCA-----TCTAGATATTTGCTAGGCAAGCAAAACCACTGTGGTTT-----TAACATTTGTTCTTAGCAGA-CTCTCACTTTTGGCTTCTTAAAGGCAAGCAATAAAAAATA-----AGTAAATTT-TGTGTATAATTAATAATTTGCTAAGAGAGTAAAGCAAGAA-----CTTACTACTAAAAAATAAATAA-CTATTT
human    TATCTGTTTTAAGGATCTTTTCTTGTCTAGATGACTGCTAGGTAG-AAA-CCACTGGGAAATCAAGTTAAACTTGTCTTACAGAGATTTCTAAATTTTTGGTTTGTCTCAAGGGCAAAAGTAAAGAAAAA-AAATTAACCC-----ATAA-CTGTTT
```

```
cow      TAAATTT-AGAAATTTAAACATTCATACAGAGTAGCAATAACATAGCAACTTGA-GGGAGA
bat      TAAATTT-AGAAATTTAAACATTTATACAGAGTAATAAT---ATATATAACTTAAAGGGGAGA
horse    TAAATA-AGAAATTTAAACATTTATACAGAGTAATAATGACATATGCAACTTGA-GGGAGA
dog      TAAATTT-AGAAATTTAAACATTTATACAGAGTATAATAACATATACAGCTTGA-GGGAGA
hedgehog TAAGTT-ATAA-----ACATATACAGAGTAGCTTAAACACAAAACTCGA-GGGAGA
human    TAAATTTAGAAATTTAAACATTTATGACAGAGTAATAGTAACTAAACAACTTGA-AGAAAA
```

D-36141 L1MA9

cow AGCTGCATCTCAAATGTAGCAAA-ACAGCCATTGACAGTAAAGTCAGATAGGTACAAAGTGTGGTGGAGTCAGAAATAGTTTTGAATT-----AGATGGAGATGGGGT-----GGGAAATGGGGAGAGTTGGTAAAAAGGTACAAACTGCCATTA--TGAGGTGAATGAGATCTGGATCTAATGTA-----GTTAACACTGATTGTATG
horse AGCTGCATCT-AAAATGTAGCTAA-ACAGTCACCAACGACGAGCCAGGCAAGCTTGGTCAGTTCAAGGTCAGAAATAGTTTTGGCTTAAGACAGATGTAGATGGGATCG-GGGAAATAGGGAGAGGGTGGTAAAAAGGTACCAACTTTCAGTTA--TAGGTTGAATAAAGTCTGAGGATCTAATGTAGAACATGGTGACTATAGCTGATAACACTGCATTGTATA
dog AGCTGCATCTCAAACGTAGCAAA-ACAGCCATCAGCAATAAAGTCAGGCGGCTGCGTCAGTCTTGAGGTTAGAAATCATTTCTGACTTAAGACAGATGTAGACGAAGTGG-----AGAAALCAGAAGTGGATAGAAAGGACACAGACTTACAGTGA--CAAGATGGATAAATGCTGAGGATTTTCATGTAAAACATGGTGAGTTTGTGATAACTGATTGTCTA
microbat AGCTACTCTCAGCTGTAAACAAA-ACAGCGATCAGTAATAAAGTCAGGCAAGCCAGCTTCTGAGA-----TTTAGTTTAAACAGATGTAGACGGGTGATGTGAAAAATAGGGAGAAAGTTGGTAAAAAGGTACAGACTTTCAGTTA--TAAGATAAATAAGGTCAGAGGATCTAAGGTTAATATAGTGACTATAGTTGATCACACT--ATTATAGA
shrew AGCAGTACCTCAAAATGCAGCCAG-----AATACAGACAATCTGGAGGTCACAAATGGGTTCTGATTT-TGATGGATGTTGATGGGGATAG--GAGAAATAGGAGGAGTGAGGAAATGCTACAAATTTTCAGCTACCTAAGATGAATAAAGTCTGAG-----TAATGTATAATGGTGA-TATGACTGATTGCACT--TGTATA
human AGCTGCATCTCAGAGGAAAGTAAA-ACAGCCACCAACAATAAGGCCACAGT-----TCTTGAGGTCAGAAAAAGTTACTGGCTTAACACAAATGTA-----
mouse AGCTGCCCTTCAAATGGAGCAACAAAATAGCTACTAACCAAGCCAGGCAACCTAAGTCAATGTTGGAGTCAAAAACTGTTGTACAGGAGACAGATGGATA-----

cow CTTGAAATTTGCTA--AGGGTAGAACTTAAATATTTCTCAG-CAAAAATAAGGTAAGGATAAATATGTAAAGTGACAGATATGTTAATG-----AAATC-AGTGGAGGATCACTTTCATAATATATACATG-TATCAAATATCACATTATACATTTTAAATGCTTGCCATTTTTCAGTTAA-AATACCTCAGTAAAGCTGAA-----AAA
horse ATTGAAATATGCTAAGGAGTAGAACTTAA-ATGTTCTCTCCCAAAAAAGGGGGGGCATAAATATGTGTGGTGAATGGATGTTATTTC-----AACTCAGAGGGGGAAATCCTTTTACAGTATACATGTA-TATCAAATCATCACATTTACACTTTAAATATCTTACAAATTTCCACTGTCAGTTATCTCTCTATAAGCTGAAAAAACAAA
dog ATTGAAATTTGCTGAAAGCCAGAACTTAG-ATGTTCTCAG--AAAAAANAATGGTCAGTATGCAAAAGTCTGGATGCTG-----ACTC-CATGATGGGAACTTTTCATATATACGTGCA-TGGTAAATAATCACACTACACTCAGTATATACAGTTTT-----GTCAAATTTGCATCAATAAATTTGGA-----AAA
microbat ATTGAAATTTGCTAAGAGATGAACTTGA-ATGTTCTCAG-----CAAAAATAAGGTAAGGATAAATATGTAAAGTGACAGATATGTTAATG-----ATTC-AATGGGGAATCCTTTACAAATATGTTATGT-ATGCAAAATCATCACATTTACACTTTAAATATCTT-CAGTTTT-----GTCAAATTT-CCTCAATAAAGCTTTA-----AAA
shrew ATTGAAATTTGCTCTGAGAGTAGAACTTAA-ATGTTCTCAG-----AAAAAGGATGGGGTAAATAAGTGGGGATAGATTTACCTGATGTTATTAACACAATATGCATTAAAGCTAATGGAGACATCTTTTTGTAATATGTACTATTGTCAAATCATCACCTTGAACTTTTTCAGTAGCTTATCTCTGTTTGTAGTTAGACCTCAAGAAAGCTTGA-----AA
human -----
mouse -----

cow AAGAACAACTGACATGTCCCTCTGAGCTGT-----GTTTCTCCAATTAGGCAAACTGCAAGTATGTCCAAATTTCTGGCCAAAGAGATGCAGACAGGGATGGCATTGGAG
horse AAGACAGATGTGGATTTCTCTGAGCTGT-----GTTTCCCCCTTAGGCAAACTGCAAGTATGTCCAAATTTCTGGCCAAAGAGATGCAGACAGAGATGGCATTGGAG
dog AAGGT--CAGAGACGCTCTGAGCTGT-----TTCTTCCCTTAGGCAAACTGCAAGTATGTCCAAATTTCTGGCCAAAGAGATGCAGACAGGGATGGCATTGGAG
microbat AAGACATTTGTAGATGCTCTCTGAGCTGT-----GTTTCCCCCTTAGGCAAACTGCAAGTATGTCCAAATTTCTGGCCAAAGAGATGCAGACAGGGATGGCATTGGAG
shrew AAAATGAAGATAGTTGTTTCTCCTATTTTCTTTTATTTTCCCTGAAATTTCTTTTCCCTTAGGCAAACTGCAAGTATGTCCAAATTTCTGGCCAAAGAGATGCAGATGGAGATGGCATTGGAG
human -----GGATGCTACTCGGAACCTG-----ATTTTCCCCCTTAGGCAAACTGCAAGTATGTCCAAATTTCTGGCCAAAGAGATGCAGACAGAGATGGCATTGGAG
mouse -----GAGCATGACTCTGAACTGT-----TCCCCCTCCCCCATCAGGATAACTGCAAGTATGTCCAAATTTCTGGCCAAAGAGATGCAGACAGAGATGGCATTGGAG

C-4642 L1M4

cow AAGAAAGGATTTTTAATGAAAGAAATGATATAAAAGAAATCTTGTAAATTTAAACG-----AAAACA-AATCCAGTAGTGAGAGTACTAT-6TGGTTCCT-6GTGCTGAGCGTGCTCTCTGTG-----CTCCCTGTAGCCCTCTGCCAGTGAACCTTTCAGCTAAATGCGGAGAGGAGTTTCAAGAAAGCCTAGGGCTCTATTTTG
horse AAAAAGGAATTTTTAATGAAAGAAATGATATGAGAAATTTCTTATTGA-ATTTAAATA-----AAAACAAGATTTTCAAGTAAAGAAATAGTATGTGGTTCATGATTCTTTGATCATATTTCTGTGCTCTGTCTGAAAC-CTCCCTGTTAGCCCTGCCCCAAGATCCTTTTATATTAATGGAGAGAGGAATGTCAGGAAGTCTGGGGCTTATTTTG
dog AAGAAAGGAATTTTTAATGAAAGAAATGATATGAAATAAATTTCTTAA-ATTTAAATA-----AAAACAATTTTCAAGTAAAGAAATAGTATGTGGTTCATGATTCTTTGATCATATTTCTGTGCTCTGTCTGAAAC-CTCCCTGTTAGTATCTGCCAATGATCTCTTTACATTAATGGAGAGAGGAATTTCAAGGAAGTCTAGG-----ATTTTG
megabat AAAAAGGCTATTTTTAATAAAAGAAATGATATGAGAAATTTTTCTTAA-ATTTAAACA-----AAAACAATTTTCAAGTAAAGAAATAGTATGTGTA-----GTCATGTTTTTGTAGTGT-----AAGTCTACTCTTGAAGCTTTTCTGTAGTTCTCACCAGATGCCATACATTAATGGAGAGAGGAATTTCAAGGAAGTCAAGGCTTTATTTTG
hedhehog AAAAAGGAATTTTTAGTAAAGAAATATACAGAGAGAAATTTTCTTATCATTAAACATA/. /ATATAACAGTATTTCAATAGTAAAGACATCAGTATTTGATTGATGATATTTCTGAGCATGTTTTCTTGTCTAT-----CTCTTTTTCTCCTTCCAGTGATTCCTTTGCAATGGT-----AGAGGAATTTTGAATTAATGACTTTTATTTTG
human GAAAAGGAATTTTTAATGAAAGAAATGATACGAGAAATTTCTTCTTAA-ATTTAAACA-----

cow ACAATTCCTTAAATGTTGAGTTATTATATATGT-----ATAACATATGATTAATGTCATTTATTTCTTTTCTTATTTGTCAGTTCCCGAAAAAACAAGAGGTTCAAGCAATGAGATGACT-CCAATTTGAAGCAGATTTCTCTT
horse ATAAATTCCTTAAATGTTGAGTATTATATAT-----ATAAAATATATATTAATGCCATTTCTCTTCTTACATCATTTGTCAGTTCCCGAAAAAACAAGAGGTTCAAGCAATGAGATGACT-CCAATTTGAAGCAGATTTCTCTT
dog ACAATTTCTTAAATGTTTAACTATTATTTG-----ATAAATATATATTAATGCCATTTCTCT-----TCAATTTGTCAGTTCCCGAAAAAACAAGAGGTTCAAGCAATGAGATGACT-CCAATTTGAAGCAGATTTCTCTT
megabat AC-ATCATCTTAAATGTTCAATTTATATACAT-----TTAGTATTATATTAATGTCATTTCTTTTATTTTTCAGTTCCCGAAAAAACAAGAGGTTCAAGCAATGAGATGACT-CCAATTTGAAGCAGATTTCTCTT
hedhehog ACAATTTGTTAATGTTGAGTATTATGTTGTTATATATTTGTCACCATATAATATATATTAATGCCAGTTCACCTTTTTTTC-ACATTTATAGTTCCCGAAAAAACAAGAGTGGCTCAGGATTTGAGATGACTCCCAATTTGAAGCAGATTTCTCTT
human -----TAATACCATTTTCTGTTTTATTTCTTTTGTAGTTCCCGAAAAAACAAGAGGTTCAAGCAATGAGATGACT-CCAATTTGAAGCAGATTTCTCTT

# CCCP-clade monophyly

## B-554 - L1MA9

```
cow      ---TGGTCCAGCTAAGCA-TATTC-ACAGACCTGACCTATAAATAATTAACCTTTATGTTTATAGTCTTAGTGTAATTGATGATTTTCAGTAATATTTATAAATTAATTTCTTAGGAGAAA-----ATAAGCCATATCAAGATATAATAGACACATAACATGTTATTTTAAAGGTATACAACATAA-----TTAGTATATGTATATATTTG
horse   AGATTGTCCAGCTGAGCAGTAACA-GTAGACTTGATATATAAATAATATAGCTTTTATGTTTATAGGCTTAATGTGATGATAAATTTGCAATAATATTTGTAATAATTTTAAATTTTATTTAGGTGAAAACTAA-----AATAAGCAAAATTAAGATATAATGATATAAAACACTGTTATTTAGTTTAAAGGTATACAACATAGTGATTTGATATATGTATATATTTG
dog     TGCTTGTGCAACTGAGCAATATCA-ATAGACTTTCATCTA---TAATATTAGCTTTTATATTTAATAATCTTTATGTACACAAATAAATTTCAATAATATTTATAAAAAT----ATTTCTTTAGATGAAAACTCAATAAATAAGCAAAATTCAGACATAATTTACATATAACA---TATTAGTTTAAAAATATACAGCAGAA-----TGATATGATGTATGTATATATTTG
microbatAGATCATCTAGCTG-GTAGTATTA-ATAGACTTGACCTATAATAG---TGACTTCTATATCTCTAGTCTTAATGTATATAGTAATAATGTCAGTAAGCTTATAAAAATTTAACTTTCTTTAGAGGAAAACTTTTAA-AGTAAGCAAAATTAAGATATAACCAGCACATGACTTTTGATTAGATTAAAGTTGACAGCATCA-----TGGTTTGAAATAACATATATGAG
megabat  AGGTGATCCAGTTGAATAGCATCA-ATAGACTTGACTTATACTAATACTAACTTTTATATCTGTAGTCAATGTAT----ATAATTTTCAGTAGATTTATAAAAATTTAAATTTTCTTTAAGAGAAAACTTAGTAATAAACAGATTTA-----AGATTTGTGTTAGTTTAAAGATATAACAACATAA-----TGATTTGATATATGTATATATGCTG
shrew   AAGTTGTACAACCTGACAACCTGTATATAGGCCTGAACATA---TGATATTAGATTTTATATTTACTGTCTTAGTACACAAAAATTTCAATAA-----TGGAATGCT-GTTTTATTTTATATAAAACCTT-----AATAAACAAATTAAGATATAAAGTAACTGAC-----TATAGGATAA-----
human  ATGTTGTCTAGCTGACCAGTATCA-AAAGAACCTGACCTATACTAATAATTAAC-TTTATATTTGTAGTCT--AATGTATGTGATAATTTTGAGTAATAAT-----ATATTAATTTTCTTTAAGAGAAAACTCAAT-AAAAAGCAGATT-----
```

```
cow      AAATAGTTAGCAGTAAGTTTGTAAACATCACACACAGT-----CACAGGTTTTTCTCTTGTGATGAGGACTTAAAAATCAGTCTAT--TTAATGCTTCATTTCTACTTTTTGAAAACTCCAAA
horse   AAATTA---CACAGTAAGTTAATTAACACCTATCACCTCATGTAGTGTCAAAATGTTTTCTTCTTTTGTAGAACCTTAAAAATAAGTCTACAATTAGTGTCTTTGTTTGTAG-TTTTTTAAAACTCCAAA
dog     AAATGACTGCCACAGTACTTTAGTTAAACATCAG-----ACGTGTTTTTTTTTCTTATGATGAGAACCTTAAAAATCAATCCAT--TTAGAGCTTTATTTCTAC-TTTTGAAAACTCCAAA
microbatAGATGATATACAGTCAATTTAGTTAAACATCATCACCTCA-----GTAAACAATTTCTTTCTGTGATAAAGATTTAAAAATCAGTCTAT--TTAGTGTCTTTATTTATAC-TTTTTTAAAAAGCCCGTA
megabat  AAATGATTAACCAATAAGTTTGTATAGCATGCATCAACTCA-----AAGTTATAGTTTTCTTCTGTGATGAGAACCTTAAAAATCAGTCTAT--GTAGTCTTTATTTTAC-TTTTTTAAAAAGTCCAAA
shrew   -----CATTTGTTTTGTTCTTTAGCCTTGTCTGCTTGAACCTAGTCTTAC-CTTAAAGCAATGTCGGTTC-TGTATGGACACAAGAAAG
human  -----TAAAAAATAAGTCCAT--TTACTGCTTTTTTCTAC-TTTTTTAAAAAGTCCAAA
```

## B-485 - L1MA9

```
cow      CAGTCCATGAAGCTCACTCACCTTCCCTGAGCT--TTATCCTCCTAAAAAC----TCTCTTCCAGCCATGCAAGGCTATTGTAATGATTAACATAGGTCATGTATGTTGAAGCACT-----TTTTATTTTTTATAAAATATATTTGACATGTGGCATTGTATAAATTTAAGGTGTGTGAC-----TTATTTGACACAGATTGTATCT---TATAATTGTCA
horse   CAGTGCATGAACTCACTCACCTCCCCGAGCT--ATATCCTCATTAAAAAGCCATCACCTTCTGGCCACACAAAGATTTTGAATGATTAATGAGGTTATGTATGTAGAAAGCACTATTTATTTTCTTTTATTTTCTATTAAAAACATTTGACATATAACA---TGTAAATTTAAGGTGTACAATACGTTGATTTGATAC-ATTTATATATTTG--TAATATTGCTG
dog     CAGTCTCTGAAACTCATCTCTCACCTGAGCTCCATATCTTCATTAATACCCCTCTCTTTCCAGCCATACAAGATTTTGAATGATTTGAAAGAGGTCATGTATGTAGAAAGCACT-----TTTTATTTTTTATTTGGGATATGTTCAACATATAGTGTGTATAAATTTAAGGTGTACCACATGTTGATTTGATTC-ATTGAAATTTGGAAACATGATGGCTC
microbatCAGCCCTGAAACTCACTTATCTCTCTGAGCT--ATATCCTTACTAAAAATTC--CTCTTTCCAGCCACCAAGGTCATTTGTAATGATTAACATGAGGTCATGTATGTAGAAAGCACT-----TTTTATTTTTTCTTTGAAATATATTTGACATATAGCATTGTGCAAGTTTAAAGGTGTATAACCTGTGGTTTGTAAACATTTACATATTTG--TAATATTGCTG
hedhehog--GTCCATACAAATCACTTACTCTTATAAAT--GTCTCCCTCTAAAAATTC-CTCTCTTCCAGCCACCAAGGATTTTGTAGTAATTAACAAGGTCATATATGTACACGTCCT-----TTTCA-----
human  CAGTCCGTGAACTCACTTATCCCTCCTTAGCT--ATAGCCTCTAAAAA--CCCTCTCTTTCCAGCCACATGAGATTTATGCAATGATTAATGAGGTCATAAATGTAGAAAGCACT-----TTTTA-----
```

```
cow      TCATGGCAATAAATAACTCCTCTGTATGTCACATAAT-TCATTTCTTTTTGGTGAATGGAAATAATTAAGATCTAGTCTCTTAGCAACTTTGATGATTTGTAATAC----TGTTGTAGAAAGCTCTGTTAAGCAGCAGAGGGAATTTGAAGATGTATGGTAATTTCTTATAAAAATAAATGTCATCTGCAGTATTTTAAAGTGCATTTTTCCAGCTTTTCAGT
horse   TTGTGCAATAAATAGCACCTCTGTACATCACATAATATCGTTTCTTTTTAGTGGTGGAAATAC-TTCATATCTAGTCTCTTACCAAGTTTCATGATTAATAGCACAATATTTG-TTTTGAAGCAGCTTTTAAACAGCAAAAGGATTTTAAAGGTGATGGTAATCTCTTATAAAA--GGTGTACATATAAATCTTAAAAATTCATTTACCAGCTTTTACT
dog     TTGTAGC-----AATAGTACTTCTATCACATCATAGAGC---ATTTCTTTTTA--GGTAGAAATAA-TTAAGATAGTCTCTTAGCACATTTGAGGGTTCTCATGCAACATTTGTAAGAACCTTTTAAACAGCAAAAGATTTTAAAGGTGATGGTAATCTCTTATAAAA--TCGATGTCTATGTT--ATATGTTCAAAATGCATCATTACCAGCCTTTAGT
microbatTTGTAAAC----ATAAGCACCTCTATCATGTGACGTAAT---GCTTTGTTTGTAGTGGTGGAAATAA-TTAATATCTAGTCTCTTAGCAACTTTGATGATTAATAATATATCATTA-AAAGAGAAAGCACTTCT-----AAACAACAGATTTTAAAGATCTATGGTAATAGAATGTAAAAATC-GACATCATATGTAATATGTTTAAAGTGCATTTACCAGCCTTTAGT
hedhehog--GTCCATACAAATCACTTACTCTTATAAAT--GTCTCCCTCTAAAAATTC-CTCTCTTCCAGCCACCAAGGATTTTGTAGTAATTAACAAGGTCATATATGTACACGTCCT-----GAAAGGAAAGGCACTTT--AGACCTAAAGATAATTTCTTATAAAGTT-----CATGTAATATGCTCAAAATGATTTACTGTCAAAT-----
human  -----CACAGCGAAGTTATTTTAAAGAT--GTAGTATTTCTTATGAAAAAGCAGGTCATATATATTTTAAAGTATTATTTACCAGCTTTACTG
```

```
cow      AGTGTATGGGCCATGAACTGAGAA
horse   ACTAGATGGTCTGTAATTTGAGAA
dog     ACTG-----TGTAAATTTGAGAA
microbatACTGTATAGTTTATAAATTTGAGAA
hedhehog----ACAGTGTATAAATACAGTA
human  TGTAA-----TCTATAAAGTGAAGAA
```

# Carnivora monophyly

## D-36629 - L1\_Carn3

```

dog      TAAATCAAGCCCAGCTC--TTAAAGGTAGATATATACCAACTAAAA--GTAAAGTTATGACATTTGCAGTCAGAGAAAGACAGATACCATATGATTTCACTCATATGTGGGATTTAAGAAAACAAAACAAAAAAGAAACAAACAA---ACAAAAGTACTCTTAATACAGAGAACAAATG--GTGGTTGCCAGAGGGGAGGTGGGGGAGTG-----
panda   TAAATCAAACCCAGCTC--TTAAAGGTAGATATATGCCATCTAAAA--TTAACTTATGGCATTTCAGTCAGAGAAAGACAAATACCATATGATTTCCGCATATGCAAGATTTAAGAAAACAAATGAAACAAAGAAAAAAGCGAGACAAAGAAAGAGACTTTTAAATACAGAGAACAAACAGATGTGGTTACCAGAGGGGAGGTGGATGGGGGAAATAGATAAAGG
cat     GAAATGAAACCCAGCTCTTTTAAAGGTAGATATGGATATCATCTAAAA-TGAAAACTTATGACATTTTCAGCT--AGAAAGACAAATACCATATGATTTCACTCATGTG--GAATTTAAACAAACGAAACAAAGAGAAAAAGAAAC-ACCCAAAAAAGACTCTTAAAGACAGAGAACAAATG--GTGGTTGCCAGTGGGGAGGTGAAGGAAAG-----
cow     TAAATCAAACCCAGCTC--TTAAAGGTAGGT-TGTGTACCATCTGAAA-GGAGAAATACATTAT-----
horse   TAAATCAAACCCAGCTC--TTAAAGGTAGATATATGACCATCTAAAA-TGAAAAGCTATGATGT-----
microbatGAAATCAATCCCAACTC--TCATCTGTAGATATTTGAACCATCCAAAC-TTAAAAATTATGATAT-----
human   GAAATTAACCCAGCTC--TTAATGGCAATATGTGTACCATCTAAAAATCAGAAATATGATAT-----

dog      -----GGGATGGATGAAATAGATGAAGGAGATTAAGAGTACACTTATCTTGATGAGCACTAAGAAATGTATAGAAATTTGTCATCATTATATCATATGCCTGAGACTAATATAACACTGT---TCATTATATTTGAATTAATAACATTTT-----
panda   GGATGAGATAGATAGAGGGGATTAAGAGTACACTTAGATGTGGTTACCAGAGGGGAGGTGGATGGGGGAAATAGATAAAGGGGATGAGATAGATAGAGGGGATTAAGAGTACACTTATCTTGATGAGCACTGGGAAATGTATAGAAATTTGTTGAATCATTATATTTGTACAACGGAACTAAT-TACCAGTGTATGTTAATTATACCTTGAATTAATAAATTTT-----
cat     -----GGTGGAGAAATAGATAAATGAGGTTAAGGG-----CTTATCTTGAAGGCACTGAGA-----AATCATTGAATCACTATATTTGATGCCTGAAACTAATACGACACTGTGTGCTAACTATACCTTGAATTAATAAATTTTAAAAA-----
cow     -----
horse   -----
microbat-----
human   -----

dog      -----TTTTGGCTCTGAAACTATATTTGTACATTCAGGCCTC--CCCC-----
panda   -----ATGACATTTTGGCTCTGATAATATAGAAATG-AAAATTCAGGCCTATA-TTCCC-----
cat     GAAATGACACTTTTGGCTCAAAACTGTGTAATTTGAAATTCAGGCCACACCCCC-----
cow     -----TTTTGGCTAT--AACTATGTAATTAATAATTCAGGCCTTGT-CCCTC-----
horse   -----TTTTGGCTATGAAACTATACAAATTTGAAATTCAGGCCATA-TCCC-----
microbat-----TTTTGCTGTGAAACTATATAATTTGCAAAATTTAGTTCACA-TCTCA-----
human   -----TTTTGGCTATGAAACTATATGATTAATAATTCAGGCATG-AAACC-----
  
```

## D-38269 - L1\_Carn2

```

dog      TACTGTACGGTGCGTAT-AAAAATCATTCTTGAGGCCACTAGTAACTAGTATTTCTA-----TTTTATTTTTCAAGTTTTATTTAAATTCAG---TTAACATACAGTGTAAATTTCTTCCAGGATAGAAATTAGTGATTCACACTTCTTAAAAACTA-GTATTTTTTAAATGAAAAATAATCTCAAAGGCAAGGG
panda   TTTTGTATGGTGGCTAC-AAAAATCATTCTTGAGGCCACTAGTCAACAGATTTTCGTACTTATTTAT-----TTTTATTTTTCAAGTTTTATTTAAATTCAGTTAAATAACACACAGTGAATATTAGTTTCAAGGTAGAAATTTAACGATTC-ACACTTACTTTACACACAG-GTATTTATTGATAAAAAAGAAATCTCAAAGCAAGGC
cat     TTTAGTATGGTGGCTATAAAAATCATTCTTGAGGCCACTAGCAACCCAGTATTTATTTATTTATTTATTTATTTATTTATTTTCAAGTTTTATTTAAATTCAGTTAAATAACATGCAAGTGAATATTAGTTTGAAGGTCTAGAAATTTATGATTCACACTTATATACAAACCCAAAGTATTAATTAAGAAAAAGAAATCTCAAAGGCAAGGC
cow     TTATTTCTATGGCTGT-AAAAACAATTTCTTGAAACCAAGTAATAGCACA-----GATTTTAAATGAAAAATAATCTCTAAACTCAGC-----
horse   TTTTATCTTATGGGTGT-CAAAATCATTCTTGAGGCCGCTAATAACCCA-----ATATCTAATTAAGAAAAATAATCTCTAAGGTAGGG-----
megabatTTTTGCTGGTAGCTAT-AAAAATCATTCTTGAGGCCACTACTAACCCA-----GATTTTAAATGAAAAATAATCTCTAAGGCAAGGC-----
human   TTTTGTCTGATGACTGT-AAAAATCATTATTTGAGGCCACTAATAACCCA-----ATATTTATTTGAAAAATAATCTT-AAAGGCAAGGC-----

dog      TATGATGAATATATATA
panda   TATGATGAATATTTATA
cat     TCTGATAAATATATGCA
cow     TATGATAAATATACATA
horse   TATCAT-AAACATATA
megabatTATGTTAAATATACATA
human   TATG---GTATATTTA
  
```

# D-41109 - L1\_Carn3

```
dog      GCAGCAAGCCATATGAAAAGGCTTTTT--TTTTTTTCTTTT-----GTAATA-TTTTAAACCACTTAAAAAAATTGTAATCTAGTGTAGTCAACATACAGTGT---TATGTTAGCTTCATGTGTACAATATAGTGATTCTACAATCTGTATATTACTCAGTGCTCGTCAAGAGAAGTGTACTCTTAATTCATTACCACTATTTACCCATCTCCCTGCCACCT
panda   GCAGCAAGCCATATGAAAAGGCTTTTTTTTTTTTTTTTTTTTTTTTTGTAGCA-TCTTAAACCACTTAAAAAAATTTTAAATCCAAGTGTAGTTAAGATACAGTGT---TATATTAGCTTCAAGGTGTACAATATAGTGATTAAACAATTCATTGTATCACTCAGTGCTCATGAAGATAAAGTGTACACTTAAATCCCTTCTATCTGTGTCACCT
cat      GCAGCAAGCCATATGAAAAGGCTTTTTTTTTTTTTTTTTTTTTTTTTG-----GTAGCATTTTTAAACCACTTAAAAAAATGTTTTTCAATGCAAGTGTAGTTAACATACAGTGTGCGGCTACATTAGCTTCAGGTACACAGAGTGTGACTCAGCAGTTCGT-----TACGTGCTCATCAAGAGAAGTGGACTCTTAAATCCCACTCACTTCTCCCTCATC-CCCCGCCACCT
cow      GCAGCAAGCCATATGAAAAGGCTCATTT--TACATACTTTCTT-----AGAGCA-TGTA-----AATAGTTAAG-----AAAGGTGTTTTGAAATAGGTTAGGTGATTTGAAATGTTTC-----
horse   GCAGCAAGCCATATGAAAAGGCTCATTT--TTAATACTTTTAT-----ATAGCA-TGTAA-----AATAGTGTAGTTAGG-----AAGGATTTTTAAAAATAGGTTAGATGATTAAATTTGATTTT-----
microbat GCAGCAAGCCATATGAAAAGGCTCATTT--TAAGTATTTTTCTT-----ACAGCA-TGCAA-----ATTAAAGTAGTTCTG-----AAGGATTTTTGAAATAGGGT-----TTAATTTCA-----
shrew   GCAGCAAGCCATATGAAAAGGCTCATTT--TTGATACCTTTACA-----GTAGTA-TGTGA-----AATAGAAATG-----ATGGTTGGATTTGGTTCTGTACTGAAATAATTTTC-----
human   GCAGCAAAACCATATGAAAAGGCTCATTT--TTAATACTTTGTT-----GTAGCA-TGCAAATAAGTTATCAGCTGTGTTTTGGA-----AATAGTAGTTATG-----AGCTATGTTTTGGAACAAGTTTAGCTG-AGTGATTTGATTTCC-----
```

```
dog      CCCCCTCTGGTAA---CCATCTATTTTCTATATTAAAGTTTGTGTTTTGGTTTTGCTGTAAAAAGGTTATCTTTAGTGTTTTTTTTTTAAAGTAGTTATTGTAAAGTAGTTATTTAAGTAGTTTAAAGGATGTTTTGGGGAAAAAAGAGGTTTTGAAAATGTGTAGGTGATTTGAATGTTTC---
panda   CCCCCTCTGGTAA---CCATCTATTTTCTATATTAAAGTTTGTGTTTTGGTTTTGCTGTAAAAAGGTTATCTTTAGTGTTTTTTTTTTAAAGTAGTTATTGTAAAGTAGTTATTTAAGTAGTTTAAAGGATGTTTTGGGGAAAAAAGAGGTTTTGAAAATGTGTAGGTGATTTGAATGTTTC---
cat      CCCCCTCTGGTAA---CCATCTATTTTCTATATTAAAGTTTGTGTTTTGGTTTTGCTGTAAAAAGGTTATCTTTAGTGTTTTTTTTTTAAAGTAGTTATTGTAAAGTAGTTATTTAAGTAGTTTAAAGGATGTTTTGGGGAAAAAAGAGGTTTTGAAAATGTGTAGGTGATTTGAATGTTTC---
cow      CCCCCTCTGGTAA---CCATCTATTTTCTATATTAAAGTTTGTGTTTTGGTTTTGCTGTAAAAAGGTTATCTTTAGTGTTTTTTTTTTAAAGTAGTTATTGTAAAGTAGTTATTTAAGTAGTTTAAAGGATGTTTTGGGGAAAAAAGAGGTTTTGAAAATGTGTAGGTGATTTGAATGTTTC---
horse   CCCCCTCTGGTAA---CCATCTATTTTCTATATTAAAGTTTGTGTTTTGGTTTTGCTGTAAAAAGGTTATCTTTAGTGTTTTTTTTTTAAAGTAGTTATTGTAAAGTAGTTATTTAAGTAGTTTAAAGGATGTTTTGGGGAAAAAAGAGGTTTTGAAAATGTGTAGGTGATTTGAATGTTTC---
microbat CCCCCTCTGGTAA---CCATCTATTTTCTATATTAAAGTTTGTGTTTTGGTTTTGCTGTAAAAAGGTTATCTTTAGTGTTTTTTTTTTAAAGTAGTTATTGTAAAGTAGTTATTTAAGTAGTTTAAAGGATGTTTTGGGGAAAAAAGAGGTTTTGAAAATGTGTAGGTGATTTGAATGTTTC---
shrew   CCCCCTCTGGTAA---CCATCTATTTTCTATATTAAAGTTTGTGTTTTGGTTTTGCTGTAAAAAGGTTATCTTTAGTGTTTTTTTTTTAAAGTAGTTATTGTAAAGTAGTTATTTAAGTAGTTTAAAGGATGTTTTGGGGAAAAAAGAGGTTTTGAAAATGTGTAGGTGATTTGAATGTTTC---
human   CCCCCTCTGGTAA---CCATCTATTTTCTATATTAAAGTTTGTGTTTTGGTTTTGCTGTAAAAAGGTTATCTTTAGTGTTTTTTTTTTAAAGTAGTTATTGTAAAGTAGTTATTTAAGTAGTTTAAAGGATGTTTTGGGGAAAAAAGAGGTTTTGAAAATGTGTAGGTGATTTGAATGTTTC---
```

# D-42560 - L1\_Carn5

```
dog      CTGCAAAAAGTTTTGTAGCAGTACCTCA-TTATATTTTTATGAAAAATAGTTGAAAATATGACAGATTGATGATGT--TGCTCCTCTAAAAATTTTTAGTTTATCTATTTTATTTTTATTATTAGTATAGTTGACACACAATTTAC--TTTAGTTTCCAGCGCACCACATAGTGATTATCATCAGTTCTATACAGCCAAAGGGTGACTACCATCTGCCACCACATCATG
panda   TTG--AAAAGTTTCATAGCAATACCTCA-TTACATTTTTATGGAGAGTAGTTGAAAATATGGCAGATTGAGTGCTTCTGTCTTCCCAAAAATTTTTACTTTTACTTTTATATTTATTTATTGAGTATAGTTGACACACAGTGACACACAGTATGTTTCAGGGTGTACGACATAGTGATTTCATCAACTCTATACCTGCCAAGTGAACCTACCACCTGCCACCACATAATG
cat      TTGCAAAAAGTTTTCATAGCAGTACCTCATTTCCCTTTTTATGAAAAATAATGAAATATGGCAGATTGATGGCTTCTGTCTTCCCCCGTTTTTATTTTACTTACTTTTCTTCTTTTCTTCTTTTCTGTTTATCTTTGAGTATAGTTCCGCCAGTGTTCATGAGTTTCAAGTTTCAAGCTCTGTACC-GAAGTGAACCTACCACCAACC-----C
cow      TTGCAAAAAGTTTTCATAGCAGTAACTCA-TTATATTTTTATGAAAAATAATGAAACATGGCAGATACATGGCTT-----AATAGTAAAG-----AAGGATTTTTAAAAATAGGTTAGATGATTAAATTTGATTTT-----
horse   TCGCAAAAAGTTTTCATAGCAGTACCTCA-TTATATTTTCTGTAATAAATTTGAAAACATAGCAGGTTGATGGCTT-----AATAGTAAAG-----AAGGATTTTTAAAAATAGGTTAGATGATTAAATTTGATTTT-----
megabat TTGTAAAAAGTTTCATAGAGTACCTGA-TTATATTTTTATGAAAAATGAT--GAAACATAGCAGATTGATGGCTA-----AATAGTAAAG-----AAGGATTTTTAAAAATAGGTTAGATGATTAAATTTGATTTT-----
shrew   TTATACAA-TTTTCATAGGGTTATGTTA-ATATATGTTATGAAAAATTTTGAAGACATGGAAGCTTGTGGTTTT-----AATAGTAAAG-----AAGGATTTTTAAAAATAGGTTAGATGATTAAATTTGATTTT-----
human   TTGCAAAAAGTTGTATCAGTAACTCA-TTATACTTTATGAAAAATAGTCAAAAACATGGCAGATTGATGGTT-----AATAGTAAAG-----AAGGATTTTTAAAAATAGGTTAGATGATTAAATTTGATTTT-----
```

```
dog      CTATTTTCAGTACCATTAACTATATTTCTGATGCTGTACCTTTTTATTACTGTGACTTACTCATTTTCAT-ACTGGAAAGCCAGATCTCCCAAGTCCGTTCACTGTGTTTTGCTGATACCACCAACCCACCCGCTCTCCCTCCTGTCTTCCCACAA-TTTTAGAGCCTGTAAAACTAAGTGGACATTTGAGAAA
panda   CTATTTTCAGTACCATTAACTATATTTCTGATGCTGTACCTTTTTATTACTGTGACTTACTCATTTTCAT-ACTGGAAAGCCAGATCTCCCAAGTCCGTTCACTGTGTTTTGCTGATACCACCAACCCACCCGCTCTCCCTCCTGTCTTCCCACAA-TTTTAGAGCCTGTAAAACTAAGTGGACATTTGAGAAA
cat      CTGCTACAAACCACTGACGATATTTCCCTACGCTGTACCTTTGACTCCTGTGATTCTTTACTCCCTACCTGAAAACCTATCTCTCCA---CTTGCTTCAATTTTCTGATTTCCCCCA-----GCTCCTCCCTCTATCTTCCCACAAATTTTAGAGCCAGTAAAGACCCAAAGCAGTCAATTT--TGG
cow      -----TCTGTCTTCCCACAACTTTTACAGACAATAAAACTCTTGTAGCAGTCAATTT--TGG
horse   -----TCTGACTCCTGACAAATTTTGAATCAATAGGACTCTAAGTAGCCATTT--TGG
megabat -----TTTATCTTCCCACAAATTTTGAAGCCACAGGATCTAAGCAGTCAATTT--TGG
shrew   -----TCTGCTCCTCAACAAAGTTTGAAGCTAATAAAACTCCAAAGCA-----TGT
human   -----TCTGCTTTCTACAAATTTTGAAGCCAAATAGGGCTCTAGGCAGTCAATTT--TGG
```

# D-43671 - L1\_Carn5

```
dog      TTTTCCATGTGCTTT-----GAGGCTTTAAAAAGGATCCAAATGAAAAAAAAAAAAAAAAAAAAAAGGATCCAAATTTGTAAGAGCATTGTTGGTGGTGACAGATGGTAGCTACACTTGTAGTGAGCATAATGTAACACAGAGATGTTGAATCACTCTGTTGTATACCTGAACTAACAT-AGCATGTGTGTCACTACACTCAAAACCACAAAAAACAATAAA
panda   TTTTCCATGTGCTTT-----GAGTCCCTTT-----AAAAAGGATCCAAATTTGTAAGAGCATTGTTGGTGGTGACAGATGGTAGCTACACTTGGGGTGGACACAGCGTAACACAGAGATGCTGACTCACTGTGTCGTATACCTGAACTAACATAAGCGTCTGTGTGTGAGCTCTACTCGCATTAATAAAAAACCCAAAAAA
cat      TTTTCCATGTGCTTT-----GAGGCTTTA-----AAAAAGGATCCAAATTTGTAAGAGCATTGTTGGTGGTGACAGATGGTAGCTACACTTGGGGTGGACACAGCGTAACACAGAGATGCTGACTCACTGTGTCGTATACCTGAACTAACATAAGCGTCTGTGTGTGAGCTCTACTCGCATTAATAAAAAACCCAAAAAA
cow      TTTTCCATTTTCTTT-----GAGATTTTA-----AATAAATAACAAAT-----AATAAATAACAAAT-----AATAAATAACAAAT-----AATAAATAACAAAT-----AATAAATAACAAAT-----AATAAATAACAAAT-----
horse   TTCTCTGTGTGCTTT-----GAGGCTTTA-----AAAAATGATCCAAAT-----AATAAATAACAAAT-----AATAAATAACAAAT-----AATAAATAACAAAT-----AATAAATAACAAAT-----AATAAATAACAAAT-----
microbat TTTTCCATGTGCTTT-----GAGGCTTTT-----AAGCAATGATTTAAAT-----AATAAATAACAAAT-----AATAAATAACAAAT-----AATAAATAACAAAT-----AATAAATAACAAAT-----AATAAATAACAAAT-----
hedgheg TTTTCCATTTGCTCT-----AAGTCTCTTT-----AAAAAGCTCCAGTT-----AATAAATAACAAAT-----AATAAATAACAAAT-----AATAAATAACAAAT-----AATAAATAACAAAT-----AATAAATAACAAAT-----
shrew   GTTTTCCCTTTTTTATGGCTTGTGAGAGGCTTTA-----AAATGATCGAAAT-----AATAAATAACAAAT-----AATAAATAACAAAT-----AATAAATAACAAAT-----AATAAATAACAAAT-----AATAAATAACAAAT-----
human   TTTTCCATGTACTTT-----GAGGCTTTA-----AAAAAGGATCCAAAT-----AATAAATAACAAAT-----AATAAATAACAAAT-----AATAAATAACAAAT-----AATAAATAACAAAT-----AATAAATAACAAAT-----AATAAATAACAAAT-----
```

```
dog      AAAAAACAATAGCAACAGAAAAATGGATCCAAATAGAGAGGTTGTGTTTGTGGTTAGACCAA-TTTG----CAATTCCTCTATTTTCAAGTATTTAGAGCTTTTTTT--
panda   AGA-----AAAAATGGATCCAAATAGAGAGGTTGCAATTTAGTTAGACCAA-TTTT----CAATTCCTCTATTTTCAAGTATTTAGATCATTTTTTTA
cat      --AAAAAATTTTACAAACAGAAAGGATCCAAAGCAGAGAGGTTGCTTTTGTGGTTAGACCAA-TTTT----CAATTCCTCTATTTTCAAGTATTTAGATCATTTTTTAA
cow      -----GGAGACTGTGTTTTAGTGGCTAGCTGC-TTTATTTTACCAATTCCTATTTTCAAAATGTTAAGAGTGTTTTTTTG
horse   -----CAGACTATGTTTATGCTAGACTGA-TTTATTTACTCAITTTCTCTAATTTGAAAATTTTATAGATTGTTTTTAA
microbat -----GGAGACTGTGTTTTAGTGGCTAGACTGA-TTTATTTACCAATTCCTCTA-TTTCAGATGTTTATAGATTGTTTTGAA
hedgheg -----GGAGACTGTGTTTTAGTGGCTAGACTGA-TTTATTTACCAATTTCAATTTACCAATTTAATAAATGTTGCTAATTTTTAAA
shrew   -----GGAGTCTCTGTTTATGACTGGATTAG-TTTATTTGCCAGGCTTCTATTTTCAAAATTTTCG-----TTTAAA
human   -----GAAAATGCTACTAGTGGCTTCTGTA-TTTACTAACCCAGTCTCTATTTTTTAAATGTTTGGTTGTTTTTAA
```

# Cow-dolphin monophyly

## C4-520 - L1-2\_BT

```
cow      TTTCCCAAGCTTTGGTGACTTTT-TTTGAAAA-----TATG---AATATCTGGTATAAAATGGCAACTTTATTTTTTAAATTTATTTATTAACATATAGTTGATGTACAA---TGATCTATTTCTAAATGTATAGTAAATAAATTTAGTTATACATATGTACACATATTACTTTTCATATCTTTGCCATTATG----TTTCCAGGATATTGAATA
dolphin TCCTCCTAAGCTTTGGTGACTTTT-TTTGAAAA-----TGATTAATAT-TGGTATAAAATGGTA-----TAAATCAAAATATAGTTGATTTACAGTGTTGTCTCATTTCTACTGTACAGTAAAGTAATTCAGTTATACATATATATAC--ATTCTTTTCATATCTTTGCCATTATGGTTTATCACAGGATATCGAATA
alpaca  TTTCCGAAGCTTTGGTGACTTTT-TTTAAAA-----TATGATTAATATCTGGTA-----TATGATTAATATCTGGTA-----TATGATTAATATCTGGTA-----TATGATTAATATCTGGTA-----TATGATTAATATCTGGTA-----
pig      TTTTCTGAACCTTTAGTGACTTAA-----AAAAAGACC/.../AGACCCATGAATAGTCTGGTA-----TATGATTAATATCTGGTA-----TATGATTAATATCTGGTA-----TATGATTAATATCTGGTA-----TATGATTAATATCTGGTA-----
horse   TTTTCTAAGCTTTGGTGACTTTG--GTTTTAAA-----AACAATCAATAAAATGGTA-----TATGATTAATATCTGGTA-----TATGATTAATATCTGGTA-----TATGATTAATATCTGGTA-----TATGATTAATATCTGGTA-----TATGATTAATATCTGGTA-----
dog      TTTTCTAAGATTTTGTACTATTTTTTTAAA-----ACCATGATAA-----TATGATTAATATCTGGTA-----TATGATTAATATCTGGTA-----TATGATTAATATCTGGTA-----TATGATTAATATCTGGTA-----TATGATTAATATCTGGTA-----
microbat TTTTCTAAGCTTTTGTACTTAT-AGTTTTAA-----TGATTAATATCTGGTA-----TATGATTAATATCTGGTA-----TATGATTAATATCTGGTA-----TATGATTAATATCTGGTA-----TATGATTAATATCTGGTA-----TATGATTAATATCTGGTA-----
megabat TTTTCTAAGCTTATGTACTTATTTTTTTAAA-----TGATTAATATCTGGTA-----TATGATTAATATCTGGTA-----TATGATTAATATCTGGTA-----TATGATTAATATCTGGTA-----TATGATTAATATCTGGTA-----TATGATTAATATCTGGTA-----
human   TTTTCTAAGCTTCAGTGACTTTTTTAAAAA-----CATGATTAATATCTGGTA-----TATGATTAATATCTGGTA-----TATGATTAATATCTGGTA-----TATGATTAATATCTGGTA-----TATGATTAATATCTGGTA-----TATGATTAATATCTGGTA-----
```

```
cow      TAGTTTCTATACTGTACAGTCAGACCTTCTTGTTTATCCGTTCTACATAAGAAATTTGTCATCTGTAGTCTCAAACCTCCTAGTTCTTCCCA-CCCCAATCTCCCTCCCTCTAGGCAATCACAGTTCTGTGCTCCATGCTGTGAGTCTTAAACAGGCAACTTTATAAAGAGTGTGACCAT-----GCTAAGCAAAGTATTTGGGGATTTGTTTGTTTTTAA
dolphin TAGTTTCTGTGCTGTACAGTAGGACCTTGTGTTTATTCACTCTATGATAAACAGTTTGCATCTGCTAATCCCAACTCCCAATTTCTCCGCCCCCACTGCCCTCCTCTAGGCAACCAAGGTGTGTCTCTATGTCTGCGAGTATTAAACAGGCAACTTTATAAAGAGTGTGACCGT-----GTTAAGCAAAGTATTTGGGGTTTGTTTATTTTTAA
alpaca  -----TAAACAGGCAACTTTATAAAGAGTGTGACCGT-----GCTAAGCAAAGTATTTGGGGTTTGTTTATTTTTAA
pig      TAAAGTGGCAACTTTAAAAAGACTGTGACCAT-----GCCAAGCAAAGTGGTTTGGGTTTGGTTTATTTTTAA
horse   TAAATGGGCAACTTCTCAAAAGTGTGACCGT-----GCTAAGCAAAGTATTTGGGCTTTTGTTTATTTTTAA
dog      TAAATAGGCAACTTTCTAAAGCAAAGCTTTTGGTTTTTAAACTAAGCAGAAATGTTTTGATTTGGGTTTATTTTTAA
microbat -----AAGGGGCAACTTTCT--AGAGTTACCTGC-----GCTAAGCAAAGTATTTGTTTTGTCTATTTTTAA
megabat TAAATGGGCAACTGTCTAAAGAAATTTGCCTCT-----GCCAAGCAAAGTATTTAGTTT-----
human   TAAAGGCAACT-CTGAAGAGTATAAAGT-----GTTAAGCAAAGTATTTGGTTTTTGTTTA-TTTTTA
```

## C4-613 - L1-2\_BT

```
cow      GTGGCTGGCTCTGGAGACAGAAATTTCTACCACCTGAGATACGACTGAGTTTTCTGCTTGGGGTTTTCCCTATCTCTGCCCTCCAAGAGTCTGGTTGATTTCCAAAACTTTCC-----CCTGTGACTTTTTTTTTTAAATTTTTTGGAGTCTGGTTGAGTTCAAAATGTTGTTTAGTTTCAGGTATACAGCAAAGTGAATCAGTTGTACTATATACC
dolphin GGGGCAAGCTCTGGAGTGGGGTTTTCTACCACCTGACACATGACTGGGTGTT-TGCTTGAGGGTTTTCACTACCTCTGCCACTAAGAGTCTGGCTGGCCTCCA AAACTCCCTGGGACTCTTTTTTTTTTTTTTTTTTAAATTTTTTGGAGTATAGTTGATTTCAAAATGTTGTTTAGTTTCAGGTATACAGCAAAGTGAATCAGTTGTACTATATACC
alpaca  GTGGCTGACTCTGGAGGTGGGATTTCTACGGCTCTGATATATGACTGGGTTTT-TGCTCAGGGTTTTCACTAC-TCTGCCCTCCAAGAGTCAAGTTTGTGCTCCAGAACCTTTCC-----TAAAGTGGCAACTTTAAAAAGACTGTGACCAT-----GCCAAGCAAAGTGGTTTGGGTTTGGTTTATTTTTAA
pig      -----TGGAGATGGGTTTTCTACGGCTCTGATGAATGACTGGGTTTT-TGCTTGGGGTTTTCGCTACCTCTGCCCTCCAAGAGTCTGGTTGGCTTTCCAAAACTTTCC-----TAAATAGGCAACTTTCTAAAGCAAAGCTTTTGGTTTTTAAACTAAGCAGAAATGTTTTGATTTGGGTTTATTTTTAA
horse   GTGGCTGGCTCTGGAGACGG-ATTTGTGTGGCTCTGATGATGACTGGGTTTT-TACTTGGGGGT-TTAACTGCCCTCTGCCCAAGAGTCTGGTTGGCTTTCCAGAACCTTTGT-----TAAATAGGCAACTTTCTAAAGCAAAGCTTTTGGTTTTTAAACTAAGCAGAAATGTTTTGATTTGGGTTTATTTTTAA
dog      GTGACTGGCTCTGAAGATGGGGTTTTCTATGGCTCTGTTGATGACTGGGTTTT-TTCAACAATATGCTCCCAAGAGTCTGGTTGGCTTTCCAAAACTTTCC-----TAAATAGGCAACTTTCTAAAGCAAAGCTTTTGGTTTTTAAACTAAGCAGAAATGTTTTGATTTGGGTTTATTTTTAA
bat      -----AGTTCTGGAGATGGGATTTCTGTGTCCCTGATGCAATGACTGGGTTTTG-TGCTTGGGGTTTTCAAGT-----CCCTCCCAACTTTCCCT-----TAAATAGGCAACTGTCTAAAGAAATTTGCCTCT-----GCCAAGCAAAGTATTTAGTTT-----
human   GTGGCTGTCTCCGAAGATGGAA-----ATATGGCTGGGTGTT-----TGGGAGTTTTCACTGCCCTGTATCTGAGAGTCTGGTTGGCTTTCCAAAACTTTCC-----TAAATAGGCAACTGTCTAAAGAAATTTGCCTCT-----GCCAAGCAAAGTATTTAGTTT-----
```

```
cow      ACACCTCTTTTACATTTATTTCCCATATAGATCATTTACAGATTTGAGTAGAGTTCCCTATGCTATGCAAGTAGGTCCTTATTAGTTATCTGTTTTATATATAGTAGTGTTGATCGTGTATATATGACTACTTTTTATTTTACACTCTCATGCGCTCAGAGTCCTAGCTGTGA-CTTTGGGACCTC
dolphin AC-TCCITTTCTAGATTTCTTTTCCCATATAGACCAATTACAGAGTACTGAGTAGAGTTCCCTGTGCCATATAGTAGGTCCTTATTAGTTATCTATTTTCTATATAGTCGT-----GTGTTTATGTGTGACTACTTCTTTATTTTACACTCTCACTCAGCTAGGAGCACTAGGTTGTAACCTCTGGGACCTC
alpaca  -----CCTGTGACTACTTGTTCCTTTCA-----GC--CAGTAGGTG-----TGTACTCTGTGATCATT
pig      -----CCAGCGACTCTTACTTATTTTACACTCTCACTCGGCCAGGAGGGCTTGGTGTGATCTGTGAGATGCTG
horse   GCTGTGACTCCTTTTTTGTTTTACACTCTCTCTCAGCTAAGAGTGCCAGTGTGACTTTTGTGATCCTT
dog      CCTATGATTTCTTTTCAATTTTCACTCTCTCA-----GCTTAGAGAGCTGGGTAGACCTTTTGTGATCCTT
bat      CCTGTGACTCTGTTTTCATTTTCACTCTCTCACG-CCTAAGAGGGGAGGTAAGACCTTTTGTGATCCTT
human   CTTATGACTCCAGTTTTACTTCACTCTCTCACTC-GGTAGGAAATGCAAGGTGTGACCTTGTGATCCTT
```

## C4-627 - L1-2\_BT

```
cow      CTTAAAAAAGTTTGGAAATAAATGGCATTAAACGAAACTTAAAGCATGAAGCTTTTGTTCCTAGTTGGTTGG-----TTGGTTTTTTTTTTTGAAGTATAGTTGATTTACAATGTTACGTTAGTTTCAGGTATAACAATACAGTGAATCAGTCTTTTATATAATAATGAGTTTTTTCAGATACTTTTCCCTTATAGGTTATTATAAAAATATAGATTATAGTTCCC
dolphin CTTAAAAAAGTTTCAATAAATGGCAGTAAATGAAACTTAAACATAAAGCTTTTGTTTATAGTTTTCTGGGGTTTTTTTTGCTTTGCTTTTTTGAAGTATAGTTGATTTACAATGTTGTTAGTTTTCTGGTGTACAGCACAGTGAATCAGTATATAT-ATATATTCGTTTTTCAGATCCTTTTCCCTTACAGGTTATTATAGAATATTGAGTATAGTTCCC
alpaca  CTTAAAAAAGTTTCAATAAATGGC-----ATGAAACTTAAACATAAAGTTTTTGTTTA-----TATGATTAATATCTGGTA-----TATGATTAATATCTGGTA-----TATGATTAATATCTGGTA-----TATGATTAATATCTGGTA-----TATGATTAATATCTGGTA-----
pig      CTTAAAAAAGCTTTCAATAAATGGCTTTAAACAAAACTTAAACATGAAGCTTTTGTTTA-----TATGATTAATATCTGGTA-----TATGATTAATATCTGGTA-----TATGATTAATATCTGGTA-----TATGATTAATATCTGGTA-----TATGATTAATATCTGGTA-----
horse   CTTAAAA-TACTTCTTCAGAACTGTCAATTAACAAAACTGAAACATGAAACTTTGTGT-----TATGATTAATATCTGGTA-----TATGATTAATATCTGGTA-----TATGATTAATATCTGGTA-----TATGATTAATATCTGGTA-----TATGATTAATATCTGGTA-----
dog      CTTAAAA-TATGTTTTTGTAAA--GGATGTTAATTTAAACTTAAACATGAAGCTTT-TGT-----TATGATTAATATCTGGTA-----TATGATTAATATCTGGTA-----TATGATTAATATCTGGTA-----TATGATTAATATCTGGTA-----TATGATTAATATCTGGTA-----
bat      CTTAAAA-TACTTTTTCAAGAAATGGCGTTAAATAAAACTTAAACATGAAGTTTTTGT-----TATGATTAATATCTGGTA-----TATGATTAATATCTGGTA-----TATGATTAATATCTGGTA-----TATGATTAATATCTGGTA-----TATGATTAATATCTGGTA-----
human   CTTAAAA-TGGTTTTTCAATAAACAGCATTAAATAAAACTTAAACATAAAGCTTTTAT-----TATGATTAATATCTGGTA-----TATGATTAATATCTGGTA-----TATGATTAATATCTGGTA-----TATGATTAATATCTGGTA-----TATGATTAATATCTGGTA-----
```

```
cow      TGTGCTGTGTAGTAGGTCCTTGTGGTTATCTGTTTTATATATAGCAGTGTTTATCTATTTTTGATACATGATATAGAGCTCAAACCTAAA-TAATTTTTTGTACTTTGGTTGATACATGT
dolphin TGTGCTATACAGTAGGTCCTTGTGGTTATCTATTTTTATATATAGCAG-GTGATTAAGTGTGATGATGAAATAAAGTTCAAATCAAAAATAAGTTTTTGGTTTTTGGTTGGTGCATGT
alpaca  -----TTAGTTTTGATGATGATGAAATAGAACTCAGATGATAAATAAGTTTTTATTTTTTGGTTGGTGCATGT
pig      -----TTAGTCTTTGATGATGAAATAGAGCTCAGATCTAAG-TAAGTTTTTGTTTTTGGTTGGTGCATGT
horse   -----TTAGTTTTTGTGATGATGATCAGAGCTCAAACCTAGA-----GTTTTTGGGTTGCTTTGATCTGT
dog      -----TTAGTTTTAGATGTGTGCCATAGAGCTTAAACCTAGG-TAACATTTTTGGTTTTTGGTTTATACATGT
bat      -----TTGGTTTTTGTGATGATGATCATAGCAATCAAACCTAAA-----TAGTTTTTGGTTGATACATGT
human   -----TTAGTTTTTGTG-AGTCAATAGAGTTCAAACCTAAA-TAAGTTTTGTACTTATT-TAAGTACATGT
```

C4-643 - L1-2\_BT

```

cow      ATGCACCTGCTTATCAAAGACGTGAGTCTTTCTGCTGCTCTGTAAGAATTCTCAGTGCATAACCCCTTTCC-----ATAAAATAT-----ACACACACACAAAAAGCAGTCTTATGACATGAAAAATC--TCTCTTGCTTCTATATGATATTGAAACTATTGGAGGATGAGGGGAAGGGATAGTTAGGGAGTATGGGAATGACATGTA
dolphin ATGCACCTGCTGATCAAAGACGTGAGACCTTTCTGCTGATCTGTAAAGAATGTTCCATGCAT-ACCCCTTTCC-----ATAAAATATACAGACATATACACACACACACTTGAAGAGCAGTCTTATGGCATGAAAAATCCTATCTTTGTTTTCTACGTGATATTGAAATATTGGAGGGTGTGGGAAGGGATAGTTAGGGAGTGTGGGATTGACATGTA
alpaca  ATGCACCTGCTCATCAAAGATGTGAGTCTTTCTGCTGCTCTGTAAGAAATGCTCCATGCAT-ACCCCTTATTTTGTGGTGAAGAAACAAAAACAGAAACATACATACACATAGACTTGAAGAGCAGTCTTATGGCATGAAAAATCCTATCTTT--ATCTTCTTTGTGATATTGAAACTAA-----
horse   ATGCCTGCTTATAAAGATGTGAGTCTTTCTGATGCTCTGTAAGAATACCTCATGCAT-ACCCCTCCCT-----GCAAAAACATAC--AGACACATACCTTAAAGCAGTCTTATAGCATGAAAAATCCTATCTT--GTCTTTTGTATGATATTGAAACTAA-----
dog     ATGCACCTGCTTATCAAAGATGTGAGTCAAGCTT-----CTTTTAAAGAATGCTCTGTGCAT-ACCCCTCCCT-----ACAATAT-----ACACAAAAACATACCTCCCTACTATCTG-----
microbatATGCACCTGCTTATCAAAGATGTGAGTCTTTTCTGCTGCTCTGTAAGAATATTCATGTAT-ACCCCTCCCT-----GCAAA-----ACAGACACAAATGATAAGTAGTCTTATAGCATGAAAAATCCTATCCAGATCTTCTGTATGTGCTATTGAAACTAA-----
  
```

```

cow      CACACTGCTGTAGTTTAAATGGATAACCAATAGGGATATACTATATA--ACAAGGAAATCTGCTCAATATTGGAACAACCTAAATGGGAAAAATAATCTGATAAAGAAATAGATACATGTGTATGTATAACTGAATCACTTTGCTGTGCACCTGAAA--CTCAACACATTGTTAATCAACTATACTCCAATATAAAATAAAAAATTTTTAAAAAGAAAAGAAACT
dolphin CACACTGCTGTATTTAAATGGATAACCAATAGGGCTACTGTATAACACACAGGGAACGCTGCTCAATATTTCTGTAACAACCTAAATGGGAAAA-GAATTTGAAAAAGAAATAGATACATGTATATGTATAACTGAATCACTTTGCTGTACACCTGCAAACTATCAACACACTGTTAATCAACTATACTCCAATGTAAAAATAAAAGTTTTTAAAAAGAAAAGAAACC-
alpaca  -----
horse   -----
dog     -----
microbat-----
  
```

```

cow      ATTGGGACTGGTCAATCAAGATCTTTTTATCTCTCTGTGCAGTACCCCTGGCCAAAG--TTTTCAAA--GTC-TACCTGAACTCTTGAAGTCTTCAAGCTCACCTTTATCTTCTCTAGGTTCTCTGCTACCCGTGAAGT
dolphin -TTTGGACCTGGTCAATCAAGATCCGTTTGTATCTCTCTGTGTAGTACCCCTGGCCAAAG--TTTCTAAC--TTTGTACCTGGACTCTTTCAGATGTCTTCAAGCTCACCTTTATTTTCTCTAGGTTCTCTGCTACCCGTGAAGT
alpaca  -TTGAGACCTGGTTATCAGGATCCCTTTTTA--TCTCTGTGCAGTACCCCTGGCCAG--TTTCTAATG-TCTACAGTGGACTCTTTCAGATGTCTTCAAGCTCACCTTTATCTTCTCTAGGTTCTCTGCTACCCGTGAAGT
horse   -TTGGGACCTGGTCAATCAAGATCCCTTTTTATCTCTCTGTGCAGTACCCCTGGCCAG--TTTCTAAGCA-TCTACACTTGGACTCTT--AGATGTCTTCAAGCTCACCTTTATCTTTTCTCTAGGTTCTCTGCTACCCGTGAAGT
dog     -TTGAGACCTGGTCAATCAAGATCCCTTTTTA--TCTCTGTGCAGTACCCCTGGCCAG--TTTCTAAGCA-TCTACACTTGGACTCTT--AGATGTCTTCAAGCTCACCTTTATCTTTTCTCTAGGTTCTCTGCTACCCGTGAAGT
microbat-TTGTAACTGATTATCAAGA-----TCTGTGTGATACCCCTGATCAATGTTTTCTTAGCA-TCTACACTGAACTCTTTTATAGTCTTTCAGCTCACCTTACCTTCTCTAGGTTCTCTGCTACTCTGTGAAGT
  
```

C4-1124 - L1-2\_BT

```

cow      TTAACCGTGCTAATGGGAAGGTAAGAAATGCTAACCCCTGGAGACCTGTAATGACAGTTGTTTCAATGGGAC-----AGTTTTCTGAATGTTAAAACTGCAATTTGAGAAA-----GACTCAGACAGAAAAA---CACTGTATCAAAAAGGAAAAGGGGCGAGGAGGGAACATTAAAGAAATATAGGGTTAACAGATACACACTACTTTTATAATATAGAT
dolphin TTAACCGTGCTAATGGGAAGGTAAGAAATGCTAACCCCTGAAGACCTGTAAGAAAGTGT-TATCAGTTGGGAC-----AGTTTTCTGAATGTTAAAAATTTGCAATTTGGAATAGACTCAGACATAGAAAAAATAATTTAGCTTACCAAAAAGGAAAAGGGGTGGGAGGGGTAATTTAGGAAATTTGGGGTTAACAGATACACACTACTAAATATAAAATAGAT
alpaca  TTAACCGTGCTAATGGGAAGGTAAGAAATGCTAACCCCTGAAGACCTGTAAGAAAGTGT-TATCAGTTGGGAC-----AGTTTTCTGAATGTTAA-----
pig     TTAACCGTGCTAATGGGAAGGTAAGAAATGCTAACCCCTGAAGACCTGTAAGAAAGTGT-TATCAGTTGGGAC-----AGTTTTCTGAATGTTAA-----
horse   TTAATCGTGCTAATGGGAAGGTAAGAAATGTTAATCCTAAGACATATGAGAGGTGTT-TATCAGTTGGGACAGTCACTTTAGTTTTCTGAATGTTAA-----
dog     TTAACCGTGCCAATGGGAAGGTAAGACATGAAACCTGAAAGACCTGTAAGGAGTGT-----GGGACAGTCACTTCACTTTTCTGATTATTCA-----
bat     TCAACCGTGCAAGGGAAGGTAAGG--GCTCACCCCGCAGACCCG-GGGACGCGTT-TGTGCGCTGGGACCGTCCCTGT-CATCTCCGAATGTTAA-----
  
```

```

cow      AAACAGCAAAATCTCTACTG-----AAGGAACATATATCAATGCTTGTAAATAA*CTATAAGGAAAAGAAATCTGAAAAGAAATATGACACA-----GAGTGTATGTATAACTGGATCACTTTGCTGTATGTTGAAACTAAC---ACATTAATAATCAGCTATACATCAAAAAATTTTTTGCATTTTCATATCTCTGCAGAGTACTGTGAAGGAA
dolphin AAACAAATAAGGCTCTACTGTATAGCACAGAGAACTATATTCATCATCTTGTAAATAA*CTATAACAGAAAAGAAATCTAAATATATATATATGTGTGTGTGTGTGTATGTGTATGTATAACTGAATCACTTTGCTCTGTG-CTGAACTGACACAACATTTGAAATCAACTATACTTCAAGAA--AATTTGCAATTTTCATATCTCTACAGAGTATTGTGAATGGA
alpaca  -----
pig     -----
horse   -----
dog     -----
bat     -----
  
```

```

cow      GCTATTTTCT-TTCGCCTTTAAGC
dolphin GCGGTTTTCT-CTTACCTTTAAGC
alpaca  GCTATTTTCTCTTTATCTTTAAGC
pig     GCTAT-----TTTATCTTTAAGC
horse   GCTATTTTCC-CTTACCTTTAAGC
dog     GCTGTTCCCTTAACTTTAAGC
bat     GCTGTCTC---CCAGCTGTAAAG
  
```

C4-1234 - L1-2\_BT

```
cow      AACAGTGTTCATCTTAAGTTGGAGACATAAACTTCTATTGAAGTGTTATCTTTTCAGTGTTC---TTCACTATATACTTAACTTTCTTTTTCTGTTTTTTAAAATTTA--TTACTGAAGTATAGTTGATTTACAGTGTGTGCTAGTTCTGGTATACAGCAAAGTGAATGAGTTATACATATATACATTTCTTCTTCATCTTTTTCCATTGTGGTTTATCAT
dolphin AATAGTGTTCATACGTAAATGGAGACATGGGCTTCTGTTGAAGTGTTAGCTTTTCAGTGTCT---TTCACTCTATACITTAACTTTCTTTTTCTTTTTTTTTTAAATTTATTTTATGATGTATAGTTGATTTGACAAATGCTGCGTTCTGTTTCTGATGTACAG-GAAGTGAATGAGTTATAC--AAATATACACTCTTTTTTCATCTCTTTTTCCATTATGGTTTATCCC
alpaca  GAAAGTGTTCATACATAGGATGGGACATGGGCTTCTATTAAAATGCTGGCTTTTCAGCGTTT---TTCACTCTATAGTTAAC-----
pig      GATAGTGTTCATACATAAATGGAGACATAAGCTTCTGTTGAAATGTTAGCTTTTCAGCATTT---TTCACTCTATACITTAAC-----
horse   AGTGGTGTCTAATACATAAATGGAGACAGGGGCTTCTGTTGAAATGTTGGCTTTTTCAGTGTTC---TTCACTCTAAC-----
dog     AGTACTGTCTAATACATAAATGGAGACATGGGCTTC---TGAAGTGTGTTTTTTCAGCATCAACTTCTCACTGTACTTAAAT-----
bat     AATAGTGTCTTACACATAAAACAGAGAGATGGGCTCTATTGGAATGCTAGCTTTTTCAGTGTTC---TTCAC--TATATTTAAC-----
```

```
cow      GGGATATTAATATAGCTCCCTGTGCTACACAGTA-----TATTGTTTATCCATTCAATATAAATAGTTTGCATCTGCTAATCCCAAACCTCCAGTCCATACCTCCCTCA-----CCCACTCCCTTGGCAACCACAAGTGTGTCI-----GTCGTTC--TTTTCATAGATACGTTTATATGTTGCTGATTTTTAGA-TTCCACATATAA
dolphin AGGATATTGAATATAGCTCCCTGTGCTATACAGTAGGACCTTGTGTTTATCCATTCTATACATAAATAGTTTGCATCTGCTAATCCCAAACCCCAATCCATCCCTTACCCACCCACCCACCCACCCCGGGCAACCAAAATCTGTTCTCTATGCTCTGAGTCTGTTTCTGCTCTGTAGAGAAATTCATTTGTTCTCATTTTTAGATTTCCACATATAA
alpaca  -----
pig      -----
horse   -----
dog     -----
bat     -----
```

```
cow      GTGATTGTACTTAACTTTTCTTTTTGCCCTTCTTAGAATGGAGAGAGACCATCCCATGAAGTACAGATAAT
dolphin GTGATTATACCTTAACTTTTCTTTTTGCCGTCTTAGAATGGAGAGAGACCATCTCATGAAGTACAGATAAT
alpaca  -----
pig      -----
horse   -----
dog     -----
bat     -----
```

C4-1341 - L1-2\_BT

```
cow      AATACAAGGTGTTGCAGTAGTTGGCATAATTAAGGGAGTTGACC---TGTTGTTGGAGAGGGTGTTC---AATCTGTGGTAT-----ATTTTTTATTTTAAATTTTTATGGAAAATAGTTGGTTTACAGAGTTGATTAGTTTCAGGTATTCAGCAAAGTGAATCAGTTATACATATAAGTATATCCACTCTTTTTTAGATTCTTTTTACCA
dolphin GATATAAGGTATTGCACGTAGTTGGCATAATCAAGGGAG-TGACC---TGTTTTGGAGAGAGTGTTC---AATCTCTGGTATTTTTTATTTTTTAAATTTTTATGGAGTATAGTTGATTTACAATGTTGTGTTAGTTTCAGGTATACAGCACAGTGAATCAGTTATATATACATATATCCAGTCTGTTTTTAGATTCTTTTACCTA
alpaca  AATGTAAGGTGTTGCATGTTAGTGACGTATTTCAAGGGAGTGACC---TGTTGTTGGAGAGGATGTTC---AATCGTGGTAT-----
pig     CATATAAGATATTGCACGTAGTTGGCATAATCAAGGGAG-TGACC---TGTTTTGGAGAGAGTGTTC---AATC--TAGTAT-----
horse   GATAGAAAGTGTGCAATGATGTTGGCATAATCAAGGGAG-TGATG---TGTTGTTGGGAGGGTGTTC---AATCTCTGGTAT-----
dog     TAAAAATAGAGTTTCAATGATGTTGGCATAATTAAGGGAG-TGATGTTTGTGTTGGGAGGGTGTTC---AATCTCTGAAAT-----
bat     AATATAAGATAGTGCATGATGTTGCCATAATCCAAAGGGG-CATG---TGTTGTTGGAGAGGGTGTTTTTACTTGAATCTCTGGCAT-----
```

```
cow      TAGGGCATTACTGAGTATTGAGTAGAGTTCTTTGTGCTGTACAGTAGATTCTTACT-GTTGTCTGTTTTATATGATGTT--TGTTATATGTCAAATCCAGTCTCCCAATTTGGTATATTTTTTAAATGATAGAGTAATAGGGGCATTTTATACGATGAGTG--CCATTAGCA
dolphin TAGGCCATTACAGAGTATTGAGTAGAGTTCCCTGTGCTATACAGTATGCTTATTAGTTTACCTATTTTATACATAAATAGTGTATATGTCAAATCCATCCATCTCCCAATTTGGTAT-ATTTTTCAATGTTAGAGTAATGGGTCATTTCTTACCAGCAGGAGTG--CCATTGGCA
alpaca  -----
pig     -----
horse   -----
dog     -----
bat     -----
```



# Cow-dolphin-pig monophyly

## C4-644 - L1-2\_BT

```
cow      TGTCAATAATATATCAATAAAGGCTCGAAT----AAAAAC----CCAAATAAAAGGTAAACCGCTGTATTCAGCATC--TTGTAATAATTATAGTGGAAAAGAAATGAAAAAGAAATACATATA-----AACTGAATCATGTGCTGTTTACCAGAACTAACACAACATTTGTAATCAACTATACTAGAAATTTTTGAAA-----  
dolphin TGTCAATAATATATCAATAAAGGCTGGAAT----AAAAAC----CCAAATAAAAGGTAAAGCTCTGTATCAACATC--TTGTAATTCCTATAAGGAAAAAGAAATTTTTA---TATATATATAT-----AACTGAA-----TTGCTGTATACCAGAACTAACACAACATTTGTAATCAAGCTATACTTAAAGTAAAAAAAAGCGGGGGGGGGGGT  
pig      TGTCAATAATATATTTGGCAAAGCTGGAAT----AAAAAC----CCAAATAAAAGGTAAAGCTCTATATTCACATCTTTTGTAAATAACCTATAATGGAGAGAAATGAAATCACTTTTGTGTATACCTGAACTAACACAACATTTGTAATCAAGCTATACTTCAAGATTTTTTTTTAA-----  
alpaca  TGTCAATAATATATCAGTAAAGCTGGAAT----AAAAAC----CCAAATAAA-----TCAATAAAA-----  
horse   GGTCAATAATATCTCAATAAAGCTGGAAT----GAAAAAC----TCAAAAAA-----  
dog     TGTCAATAATGTCCCAATAAATCTGGAAT----AAACCCCTCCTCTCAAAAAA-----  
bat     TGTTAATA----TCTCAAAGCTAGAAC----AAAGAC----CAAATAA-----  
shrew   TTTTATT--TATGTCATTAATACTAGAGTTTTTAAAAAC----CACAAA-----  
human   TCTAAAAAGTAA CGGAGGAGAGGC GGAAC--AAAAAG-----AAAAA-----
```

```
cow      GAGTAAAGCTAATAAATGTTGGACAGACTAGAAG-CAGTATCTCCAAGAAAG-----GAACTGGG  
dolphin GGGTAAAGCTAATAAATGTTGGACAGACTGGAAG-CAATAGCTCCAAGAGGAG-----GGACTGGG  
pig      AGGTAAAGCTAATAAATGTTGGACAGACTGGAAG--TAACAGCTCCAAGGAGG-----GACTGGG  
alpaca  AGATAATGTCAGTAAAGTGTGGACAGATTGGAA--CTGTAGCTCTAAG-----GGACTGGG  
horse   AGGTAAAGCTAATAAATGTTGGACAGATTGGAAAGCCAGTAGCTCCAAGAGGAAAGCACTGTAGTCCCAAGTAGAGACTGGA  
dog     AGATAAAGCTAATAAGATGTTGGACAGATTAAACAG-CTGTAGCTCCAAGAGGAGGACATGTAGTGCCAATGTAGACTGGG  
bat     AGGTAAATCTAATAAATGTTGGACAGATTGGAAAG-CAGTGGCTCCAAGGGGAGGACATGTAGTGCCAATATAAGGACTGGG  
shrew   AGGTAAAGCCAAATGAATGTTAGATAAGAAAGTAAA-----AGAGGGA-----TATATAACTGGG  
human   TAGTATAAGCTGAAACTGTTGGACAGATTAGACG-TAATAGCTCAAGAAAGAGGACGTGTAGGGCCAATAGAGATTGGG
```

## C4-1343 - L1-2\_BT

```
cow      -TCTTGCTG---CTAAGTAGCTTTTGAATCTAATCAGTAATGTATAG--AGAGGTCAGTGTGGGCACGTTCTTTTTTTTCTCCTT-----CAAATTTGATTAGTTGATTTACAATTTGCATTAGTTTCA-GATGTATAGCACAGTGATTTGGTTATACATATATACATA--AT-----TGTTTTTCAGATGCT  
dolphin -TCTTGCTG---ATAAGTAGCTTCAATGACTCTGGTCAATAACTGTATAG--AGAGGTCATTGTAGGCACTAGGATT--CCCCAACCCCCCCCC-----AAATTTTGACTTAGTTGATTTACAATTTTCGGTTAGTTTTCAGGGGGTACAGCAAAGTGATTTGGTTATACGTATGTATGTATATGT-----TCTTTTTTCAGATTTCT  
pig      -TCTTGCTG---CTAAGTAGCTTCAATGACTCTGGTCAATAACTGTATAGTAGAGGCCAGTGTAGGTCGGGATTTCTTTTTTAAAAAAATTTTTTTG/. /AAACAAAAAAATGACATGGTTGACTCAAGAACTTGAATTAATTTCA-GGTTACAGCAAAGTATTTGGTTATACCTTACATGTATACCTATATGTGTGTAGTGTATGTTTTTCAAAATATT  
alpaca  -TTTTGCTG---CTAATTAGCTTCAATGACTCTGGTCAATAACTGTATAG--AGGGATCAATATAAGGTCCTAGAAAT-----  
horse   CTTTTCTGCTGCTTATAGTACCTTCAATGACTCTGGACCGTAACGTATAGAG--AGAGCCAGCATAGGTCCTAAGATT-----  
dog     -TTTTCTG---CTTAGTAGCTTCTTGA--CTGGTCAGTAAC--TAGGG--AGATGCCAGTGTAGGTCCTAAGATT-----  
bat     -TTTTGCTGGAACTTAAATAGCTTCAATGA--CTGGTCAGTAACTGTATAG--CAAGGCCAGCATAGGTCCTGGGATT-----
```

```
cow      TTTCCTTTTG66TTATTGTAAGACATTAAGATGAATTTCCCTATGCTATATAGTAAATCTTTT---AATATGTTTACTTTGTAAGTAGCATATCTGTTAAATCCCATATTTCTAAATTTATCCCTCCTCCTTTCCCTTTTGGTAACCATAAATTTGTTTTTGTGTC--TGAATCTGTTTCTGTTTTGAGTTG66TTATTTTATATTAAGTGTGTGAATCTTT  
dolphin TTTTCTTTTAA66TTATTGTAAGATATTAAGATAAATTTAATTTGCTATGTAGTAAATCTTTT---CATCTATTTACATGTAGTAGTGTGTATCTGTCAATCCCATACGCCAATTTATCCCTTCTCCCTTTCCCTTTGGGTAACCATAAATTTGTTTTCTGTGTCTATACGTCTGTTTTGTTTTGTAAGTTCAATTTGATATG66TGTAGGATCTTT  
pig      TTGCATTAATTTTGCAATATAAGATGTTGAGTATAGTTCCCTGTGCTTTGCAAGTAAACCCCTTTTGTCAATCTATTTATGATAGTAGTGTGTATCTGTTAATCCCATACCTCTACTTTATCTCTCC-CCCCCTTCTTTTTGGTAAATATAAATTTTGTCTCTATGTCTATGAGTTTGTTT--GGTTTGAATAAGTAAAGTTTGTTCCTATG66TG-----CTT  
alpaca  -----CTT  
horse   -----CTT  
dog     -----CTT  
bat     -----CTT
```

```
cow      AGGAAGGGCACTGGGACAGAATGTTCAAG--TTTATATGTGA-GAACAGAGC---TCCAAGTTTGTATTTCTTAACCAT-----CTTTCATCATTTAAAAAATTCCTTTGCCCGAAATTTCTTC---  
dolphin AGGAAGGGCCATTAGGACAGAATGTTCAAG--TTTTATACCTGA-GTTCAGAAC---CCCAAAGTTTGTATTTCTTACCAT-----CTCTCATC-TTTTTAAAAATTCCTCGCCCAAGATCTCTCC---  
pig      AGGAAGGGCCATTAGGACAGAATGTTCAAG--TTTATATGTGAAGAACCAAGAC---CAGAAAAATTTGTATTTCTTATCAT-----CTCTTTATTTTTAAAAAATTCCTCGCCCAAAATCT-----  
alpaca  AGGAAGGGCCATTAGGACAAAATGTTCAAGTTAATTAATATGTGAAGAACCAAGAAC---TCCAAGTTACTAATTTCTTACCAC-----CTCTCATCTTTTTAAAAAATTCCTCTGCTCAAAATATTTCT---  
horse   AGGAAGGGCCATTAGGATAGATGTTCAAG--TTAGACCTGGGGAACCAAGAAC---TCCAAGTTTATGTTTCTTATCTCTCATTCTTTTTTTTTTTTTAAAAATTCCTCTGTTAAAAATCTTTCT---  
dog     AGGAAGGGCATCAT---TAGAGTGAATCAAG--TTATACCTGAGGGACATAGAAAGAACCCGCAATTTGCAATTTCTTACCACCTCAATTTTTCTTTCTTTTTTAAA---TCTCTTTAAAAATCTTTTTTT  
bat     ---AGGCCATTAGGACAGACTGTTCAAG--TTAGCCGTGAGGACCAAGAAC---CTTAAATGTATATCTCTTGTACTT---CTCTGTTCTTATTTATAAAAAATCATCTGTTAAAAATCTTTCT---
```

# Cetartiodactyla monophyly

C4-93 - L1-2\_BT

```
cow      TTGGCTGCATAATTTTCCCTAGATATTACCT- AAAGTCCATATTATATCTTTTAAAAAATTAGTTACTT-----ACTCATTTATTTTTTAAAGGATAGTTGATGACAAATATATTTAAGTTTCAGGTGGACAACATAGTGATTCCTCAACTTTTCAAATATTTACTCTGTTTATCATTATGCATAAATGGGCTATATCCCTGCACATG
pig      TTGGTTGCAGAAATTTCCCGGAGACATTTGTCT- AACATTCAATGTTATTAATGAATTAATAGTTTATATTTGCTCAATTAATAGTTTCAGTTAAATTTATTTATTTAAGGATATAGTTGATGCACAATACTATTTAAGGTTTAGGTGTACAATGTAGTGATTTTCAAATTTAAATATG- TATTCATTATAGTTTTTATAATATATTTGGTTATAGTCCCTGTCCTGTA
alpaca  TTGGCTGCAGAAATTTCCCTGGAAATGTTGTCT- AAATCCATATTTTCTTTTAAAAG-----TTGTTATTTTTTATGAGGTATAGTTAATGTACAATATTTTAAAGTTTCAGGTGTATGACATAGTGATTCACAAATTTTAAAGATTA- TATTCATTTTGTAAATTTGTAAAAATTTAACTATAGTTCCTGTGCTGA
horse   TTGGTTGCAGGATTTTCCCTGGAGATGTTATCT- AAAACCCATATTTTTC-----TTGTTATTTTTTATGAGGTATAGTTAATGTACAATATTTTAAAGTTTCAGGTGTATGACATAGTGATTCACAAATTTTAAAGATTA- TATTCATTTTGTAAATTTGTAAAAATTTAACTATAGTTCCTGTGCTGA
dog     TTGGTTGCAGAACTCTCCCGGAGACATGATCT- AAATCCTACTTTATTTTC-----TTGTTATTTTTTATGAGGTATAGTTAATGTACAATATTTTAAAGTTTCAGGTGTATGACATAGTGATTCACAAATTTTAAAGATTA- TATTCATTTTGTAAATTTGTAAAAATTTAACTATAGTTCCTGTGCTGA
cat     TTGGTTGCAGAAATCTC- AGAGATAGGATCT- AAAACCCACCTTATGCC-----TTGTTATTTTTTATGAGGTATAGTTAATGTACAATATTTTAAAGTTTCAGGTGTATGACATAGTGATTCACAAATTTTAAAGATTA- TATTCATTTTGTAAATTTGTAAAAATTTAACTATAGTTCCTGTGCTGA
panda  TTGGTTGCAGAAATCTCTTGGAGATGTGTCT- AAAACCCACATGACGTC-----TTGTTATTTTTTATGAGGTATAGTTAATGTACAATATTTTAAAGTTTCAGGTGTATGACATAGTGATTCACAAATTTTAAAGATTA- TATTCATTTTGTAAATTTGTAAAAATTTAACTATAGTTCCTGTGCTGA
megabat TTGGTTGCAGAAATTTTCCCTGGAGATGTTGTCT- AAAATCTATATTTTTC-----TTGTTATTTTTTATGAGGTATAGTTAATGTACAATATTTTAAAGTTTCAGGTGTATGACATAGTGATTCACAAATTTTAAAGATTA- TATTCATTTTGTAAATTTGTAAAAATTTAACTATAGTTCCTGTGCTGA
microbat TTGGCTGCAGAAATTTTCCCTGGAGATGTTGTCT- AAAATCCATATTTATGTTTT-----TTGTTATTTTTTATGAGGTATAGTTAATGTACAATATTTTAAAGTTTCAGGTGTATGACATAGTGATTCACAAATTTTAAAGATTA- TATTCATTTTGTAAATTTGTAAAAATTTAACTATAGTTCCTGTGCTGA
human   TTGGTTGCAGAACTTTCCAGGGATGTTATCTAAAAAGCCATATTTATTTTC-----TTGTTATTTTTTATGAGGTATAGTTAATGTACAATATTTTAAAGTTTCAGGTGTATGACATAGTGATTCACAAATTTTAAAGATTA- TATTCATTTTGTAAATTTGTAAAAATTTAACTATAGTTCCTGTGCTGA
```

```
cow      CAATATATCCTGTAGCTTATTTATTTTATACATAGCAGTTTGTCTCTTAATCCCGTACCCTATGGTATCTTCCCCTACCCGCTCCCCTCTCCCACTGGTCATCACTGGTTTGTCTCTGTGAGTCTGCTTCTAT-----TTGTTATTTTCACTAGCTTGTCTTTTATAGATTCCACATAGAAG---GT CATATAGTATAACATCTATGTTGTT
pig      TGACATATCCCTGTAGC---TATTTTTATACATAGTAGTTTGTACCTTGTAAATCCCTGTCCCC---TATCTTGCCCCCTCCCCTCCC-TGCTCCTACTGATCACCACCTGGTTTGTCTCTATATCTGTGAGTCTTATTTTCATTTTTGTTCAGTTCAGCCTAGGTTCTTTTTGTCTTTAGATTTTCAAGAAATAGTAGTATCATACAGCATAAAACTATACTGTT
alpaca  CAATACATCCTGTGGCTTATTTATTTTATACATAGTACTTTGTACCTCTTAATCCCTACCCC---TGCTTGTCCCCCTCTCCCCTCCCACATTGGTCCCCACTAGTCTGTTCTCTGTATCTGTGAGTCTGTTTCTTTT---TTGTTATTTTCACTAGTCTGTGTACTTTTTAGATTCCACATA-TAAGTATATTTACAGTATAAAAGCCATATTTT
horse   -----TTGTTATTTTTTCACTAGTCTGTGTACTTTTTAGATTCCACATA- TAAGTATATTTACAGTATAAAAGCCATATTTT
dog     -----TTGTTATTTTTTCACTAGTCTGTGTACTTTTTAGATTCCACATA- TAAGTATATTTACAGTATAAAAGCCATATTTT
cat     -----TTGTTATTTTTTCACTAGTCTGTGTACTTTTTAGATTCCACATA- TAAGTATATTTACAGTATAAAAGCCATATTTT
panda  -----TTGTTATTTTTTCACTAGTCTGTGTACTTTTTAGATTCCACATA- TAAGTATATTTACAGTATAAAAGCCATATTTT
megabat -----TTGTTATTTTTTCACTAGTCTGTGTACTTTTTAGATTCCACATA- TAAGTATATTTACAGTATAAAAGCCATATTTT
microbat -----TTGTTATTTTTTCACTAGTCTGTGTACTTTTTAGATTCCACATA- TAAGTATATTTACAGTATAAAAGCCATATTTT
human   -----TTGTTATTTTTTCACTAGTCTGTGTACTTTTTAGATTCCACATA- TAAGTATATTTACAGTATAAAAGCCATATTTT
```

```
cow      AATTGATTTGTTTTAGGCAG-----AACAAAAAGCAGTATTAGTGTCCGTGGTCTGACTCATTTTG
pig      GATTGATGTGTTTTAGGCAG-----AACAAAAAGCAGTGTAGTGTCCCATGGCCTGGCTCATTTTCA
alpaca  CCTCAATTTGTTTTAGGTAG-----GGAAAAAAGCCATCGTAGTGTCCGTGGTCTGGATCACTTTGG
horse   --CTGGTTTGTTTTAGTAG-----AAAAAAGCAATATTAACTTTA-GGTCTGACTCATGTCA
dog     --TTGATTTGTTCTAGGTAGAAAAAAGCAATATTAGTGTCCCATGGTCTGGCTCATTTTCA
cat     --TTGATTTGTTTTAGGTAG-----GAAAAAAGCAATATTAGTGTCCCATGGTCTGGCTCATTTTCA
panda  --TTGATTTGTTTTAGGTAG-----AAAAAAGCAATATTAGTGTCCCATGGTCTGGCTCATTTTCC
megabat --TTGATTTGCCCTAGGTAG-----AAAAAATAGCAATCTTATAGTGTTCATGGTCTGGCTCATTTTCA
microbat --TAATTTGTTTTAGGTAG-----AAAAAAGCAATCTAAGTGTCCATGGTCTGGCTCATTTTCA
human   --TTGATGTAATGTAG-----AAAAAAGCAGTATTGGTGTCCATGACTGTGGCTCATTTTCA
```

# Conflicting retroposon insertions

## #6017 (carnivora+chiroptera+perissodactyla) - (cetartiodactyla)

```
dog    GAATAATTGTTGAAA-----TTTTTACTTAT-----AACAAATTTTTCTACTACATGAAAATAACCTGGAGCCCTTACA-----AATGTGTTTGTAGGTTTATATCTTGTACTAACAT---GTTACCTTAGTGCT---GTTAACTATTTAATGACAAATTTAAAAAATTTTATGTATGCCA---TAGGTG-----TTT-ATTGAGGTATAAATGATA
horse  GAATAATCCITTTAAA-----TTTTTATTGTACTTATAAATAATTTTTCCACATGTGGAAGTCATAGTGGAAACCTTACA-----GCATGTGTTTGTATGTATTATCTTGGACCTAACATTTAGTTACCTTAGTTTTCTGTTAGGGTGTTA-TGACAAATTTT-GTGTATGACA---TATATATAA-CTATTTTTTTTTAATGAGGTATAAATGACA
megabat CAATAATCTTTTAAA-----CTTTTATTCTTGT-----AACCTTTACCATTAGATGGAATAATAGTGGAGCTACCTACATATAAAGCATTTTGTATATGTATTATGTCCTGTCTAAA-----ATTT-TGAGAGCTTT-CAAAATTTTTGTGTATGATG---TATGCTAAGTTTTTCTTTTAAATGAGGTATAAATGATG
alpaca AAATTAATCCITTTAAATAATTTATTTGTTATTTCTTATATAAATAATTTTTTACCACATGGAATAAACAAATGGAAACCATATACA-----ATGTGTTTATGTTTATATCTTGGACCTAACATTTAGTTACCTT-GTTTTCTGTGAAAGTATTTAGTGACAGTTTTT-CAAAATTTTTGTGTATGATA---TACATGTAAA
cow     GAATGATACCTTAA-----TTTTTATTTATTTTTA---ACICTTTTTATATGTGAA-----AGCCACCTATA-----GTATTTTGTATATGTACAT-TTGCCTAACATTTAGTT-CATTTACTACTATTTAAAGTGTGACTGATAAATTTT-CAAACTTTTATATGATA-----TTAAA
human   GAATTAACCTTTTACA-----TTTTTATTTATTTTTA-AATAACTTTTTATCATGTGG-----AGCCACCTATA-----GCATGTATTTATGTTTATAATTTGACCTAACATTTTACCTTGAATTTCTGTAAAGCTGTTAGGTGACAAATTTT-CAAAATTTTGCATATGATGATTTGTGTATTA-----
```

```
dog    TATA-----CAITTAGTTTTCTGATGATAGGGTAAATAATTTGATATTTGTATACATTTGAAATGATCACCACAGTAAGTCAGATATAATCACATCCATCACCACACAGTGTAAAAAATTTTTTTTTCTTTTGAGAACCTCTAAGATTTTATTACTCTCTTAGCAACTTTAAAAAATGACACTAGAATAATTAACCTATAGTCTGCGGTTT----TAATTC
horse  TATAAGATTCTATTAGTTTCAGGTGTGCAACATAATGATCAATATTTGCATATGCTGCAAAATGATCACCACAGTAATCTAGTTACCA-----TCCATCACCACACAGTGTAC-GAAATTTTTTTCTTATAATGAGAAGCTTTTAAAG---ATTTACTCTCTTAGCAACTTTAGAT-ATGCAATATGGTATTTGTAACCTCGAGTATAT--GTTTTAAATTAATTTA
megabat TATAACATTATATTTGTTTCAGGCATACAGCAATAAGACTCAATTTTTGAATACACATGAGAAATGATCATCACAATAAGTTTAGATACCA--ACTGTCAAGTATTTATAGTATTGCAAAAGTTTTTTCTTGTGATGAAAACTTTTTAAAG---ATTTACTCTCTTAGCAACTTTCAAAT-ATGAACTATAGTACTATTAACTATAGTATAAGTTTTAAAGTAAATTTA
alpaca -----
cow     -----
human   -----GTTTTAAATTAATTTA-----GTTTTCAAAATTAATTTA-----GTTTTAAAGTAATTTA-----
```

```
dog    TAAA-----CTTGATTTAAGAACCAGAACTGAATGGAATTAAT-----ATGTTAACAGTTTCTGAAT----T
horse  TAAAGTAACCTTTGATTTAAGAATTGAAGATTGAATGGAAGTAAAT---GTAAGTTCTTAACACAAAGTTTCTATGAGT----T
megabat TAAAGTAATCTTGATTTAAGATTTAAGATTGAATGGAAGTAAAT---GTAAGTTCTTAACACAAAGTCTCTATGAGTTACAT
alpaca TAAAGTACCCCTGATTTAAAAATTAAGGATTGAATGGAACCTAA-----AAGTTCTTAACATAAAAATTTCTA---AGTTACTT
cow     TAAAGTAACTTGAATTTAAAACTGAAGATTGAACAGAACTAAAA---GTAAGTTCTTAACATAAAAATTTCTATGAGT----T
human  TAAAGTAGCC-----TTAAGAACTGAAGACTGAATGGTATCAAATCTAAGTTAGTTTTAGTGCAAAATTCCTATAAGCTAATT
```

## #7214 (carnivora+cetartiodactyla+chiroptera) - (perissodactyla)

```
panda  AAAACAAGAATTGTC-CTGCTTCTGTTGAGGTTAAGA-TACTAATAT-CCTGGTTTATTT-----TTAAACCTTTTTTAAATGAAGTATGAT-----TATTAGTTTTGGGCGTACA--ACATAATGATTTGATATTTGTGCCATTGCAAAATGATCACTGTCTCGGTTGATTTTGGGTTTTTTTTGGGTTTTTTTTGTTTTTTTTTTT
cat    AGAATAAGACCTGTC-CTCTCTTCTGTTGAGGTTATGAACTACTCATGT-CCTGGTTAAATTT-----CAAATCTTTTAAATCGAGGCATAATGACCTACAGCATTATATTCGCTTGAGGTGTGCA--ACATAACGATTCGATGTTTGTGTACGTTGCAAAACGATCACAG-----
dog    AAAACAAGAATT-----CTCTCTTCTGTTGAGGTTATGATG-TACTAATGT-TCTGGTTTATTTT-----TAAGCCTTTTTTAAATGAGGCATAGTTGACATATAACATTATATTTAGTTTCAGGTGTACA--GCATAATGATTTGGGATTTGTATACATTGCAAAATGATC-----
cow    GAAACAATAATTTGCTCTTCTGTTGAGGTTAG-ACA-TACTAATGT-TCTGGTTTGTTCAGTTATTAAGTAA-----CTTTTTAAATGAGGTTGAAATGAC-----ATATTTGCTTTGAGGTGTACA--GCATAATGATGCAATATTTGTACGCAATTTGAAATGATC-----
dolphin AAAACAAGAATTGATCCTTCTCTTCTGTTGAGGTTAG-AGG-TACTAATGT-CCTGGTTTATTTATTTAATAAAGAAATTTTTTTTTAAACTGAGGTTAATTTGACATAAAA--GTTATATTTGGTTTTGGGTTGACA--ACATAATGATGCGATATTTGTATACATTGTAATGATC-----
alpaca AAGAC-----TTTTCCCTTCTTCTGTTGAGGTTAGGGG-TACTAATGTCCCTGGTTTATTTATTTAATAAAGAAAG-TTTTTTAAATGAGGTTAATTTGACATAACAAGATTTATTTGTTTCTGTATACA--GTATAATGATGCAATATTTGTATACATTGTAATGATC-----
megabat AAGACAAGAAGCTGTTTCT-----CTCTGTTGAGGTTAG-AGG-TACTAATGT-CCTGGTTTATTTATTTA-----ATTTTTAAATGAGGTTAATTTGAAATATA-----ACATTAAGTTTTAGGTATATATTTAGGCAATGATTCAGTATTTGTTTACATTTGTAATGATC-----
horse  AAAACAAGAATTGTTTCT-----TTTTCTGTTGAGGTTAG-TGC-TGCTAATGT-----
shrew  AAAACAATAATCCCGCCACTCTTCTCTGTTGAGGTTAG-AGG-CTCT-----
hedhehog AAAACGAGAACCAATTTCCCTACCTTTTG--GGGCTTAT-AGG-TGCT-----
human  AAAAATAAAGATTTCTGTTTCTGTTGAGGTTAT-AGA-TACC-----
```

```
panda  TTTTTAAAGATTTTATTTATTTTAAACAGAGATAGACACAGCCAGCAGAGAGGGAAACAAGCAGGGGGAGTGGGAGAGGAAGAGCAGGCTCACAGCAGAAAGAGCCTGACGTGGGGCTCGATCCCAATACGCCGGGATCACGCCCTGAGCCGAAAGGAGACGCTTAAACCGCTGTGCCCCAGGCGCCCTGCTCGGTTGATTTTATCCGGTTTATTTCTGTC
dog    -----ACTGCCCTGGATTTTATTTGATCCAGTTTATTTGATA
cat    -----ACTGCTCTCGTTTATTTGATCTAGTATTTTATA
cow    -----ACTGTTTGG-----TTTTAACTCAAATTTATTTACA
dolphin -----ACTGTTCTGG-----TTTTAACTCAAATTTATTTACA
alpaca -----ACTGTTCTGGTTTATTT--ATCCAAATTTATTTCTA
megabat -----ACTACTCTGGTTTATTTTAACTCAAATTTTATTA
horse  -----CTTGGTTTATTTTAACTCAAATTTATTTA--
shrew  -----ACTACTCTGGTTTATTTTAACTCAAATTTAGGTGATA
hedhehog -----AATATCTTAACTCAATTTTAACTCAAATTTGTTTTAT
human  -----AATTTCTAGTTTATTTTAACTCAAAGTATTTGTAT
```

```
panda  ACITTCAGCAGTTGGAATTAGGATGAAACATGTAATA-TGT
cat    ACITTCAGCAGTTGGAATTAGGATGAAACATGTAATA-TGT
dog    ACITTCAGCAGTTGGAATTAGGATGAAACATGTAATA-TGT
cow    GCITTCAGCAGTTGGAATTAGGATGAAACATGTAATA-TGT
dolphin GCITTCAGCAGTTGGAATTAGGATGAAACATGTAATA-TGT
alpaca CCITTCAGCAGTTGGAATTAGGATGAAACATGTAATA-TGT
megabat GCITTCAGCAGTTGGAATTAGGATGAAACATGTAATA-TGT
horse  -----TAGGATGAAAGGTTGTAATA-TGA
shrew  GTTTCAGC--TTGGGGTTGGGATGAAAGATGATCA-TGG
hedhehog ACITTCAGCAGTTTGGGATTAAGATAGAGATGATCA-TGT
human  GCITTCAGCAGTTGGAATTAGGATACAAAGTATAATA-TGT
```

#8382 (cetartiodactyla+perissodactyla+chiroptera) - (carnivora)

```

cow      CTAAGGCCATCTATTGAGTAAGTT-TCTATTGA--CTATTTAAITGAAGTAATTTTTTTTT-ATCAGTTCAAGTATACACACAGTGAATCAGTGTATGCTATATTGTAAATGATCACAGTGG---ATACAAT-----TAACATGCATC-----
alpaca  CTAAGGCCATTTACGTTGAGTAAGTT-TCTATTAACTGCTTTAAITGGAGTAAGCTTTTTTAT--CAATTCAGATGTACCACATTAAGTACTCAGTATACGTTACATATTGTAAATGATCACAAATTA---GTAAAGT-----TAACGTGTATC-----
pig     CTAAGGCCATCTATTGAGTAAGTT-TCTATTAACTGCAATTAATGGAGTAAGCTTTTTTAA--TCAGTTTCCGGTGTACGACATAATGATTCAGTGTATA--TGTAATTTGAAATGATCCCAATGA---GTACAGC-----TAACATGCATC-----
horse   CTAAGGCCATCTATTGAGTAAGTT-TCTATTAACTCTCTTAACTGAGTAATTTTTTAA--TTAGTTTTCAAATGTACACACATAAATGATTCAGTGTATA--TGTAATTTGAAATGATCCCAATGA---GTACAGC-----TAACATGCATC-----
microbat CTAAGGCCATCTATTGAGTAAGTT-TCTATTGA--TTAATTTGAATTTGAAGTAATATAGTTTGTATTGTTTCAATGTACAAATGTAATGATTCAGTGTATA--TGTAATTTGAAATGATCCCAATGA---GTACAGC-----TAACATGCATC-----
megabat CTAAGGCCATCTATTGAGTAAGTT-TCTATTGACTACATAACTGAAATAATTTTTTAA--TTAGTTTTCAAGTGTACAGCACAGTGAATCCGATATGTATATATTAATGATCATTGCTATAA---GTCTATTGCAATGCATCAGTCTATTACTACATGCATC-----
dog     CTAAGGCCATTTATGTTGAGTACGTT-TCTATTAACCTGTTTAAITGAAATAATACTTTTTA-----
panda  CTAAGGCCATCTATTGAGTAAGTT-TCTATTAACCTGTTTCAAITGAAATGAAGTTTTTCG-----
shrew  CTAAGGCCATCTATTGAGTAAAGTT-TCTATTAACCTGTTTCAAITGAAATGAAGTTTTTCG-----
hedgheg CTAAGGCCATCTATTGAGTAAAGTT-TCTGTTAACTGTTTAAITTAATGACACAAATTT-----
human  CTAAGGCCATTTATGTTGAGTAAAGTT-GTTATTGACTCTGTTGGATTGAAATAATTTTT-----

```

```

cow      -----
alpaca  -----
pig     ATGGAAGTCCCAAGGCTAAGGGTCGAATAGGATCCATAGCCGCTAGCCTAAGCCACAGCCACAGCAGCCGAAATTCGAGCCACATCTTTGACCTCCGCTACAGCTCATGGCAATGCCAGATCCTTAAACCCTAGGCAAAAGCCAGGGATCAAACCCCAACATCTCATGGATCCTAGTCGGGTTTGTAAACCCCTGAGCTGCAAAAGGGAACTCCCAATAAATCCITTTT-----ATCACACATAGTAATATTTTAA
horse   -----
microbat -----
megabat -----
dog     -----
panda  -----
shrew  -----
hedgheg -----
human  -----

```

```

cow      TAATGTTTTACTCTCTCT-----TGTGCACCAGATAC-TCATATTCTTTCTGATGCTCTTGCTTTAGTT
alpaca  TAATGTTTTACTCTGTTCT-----TGTGCATGGGACAC-TAATGTTCTTTCTGATGCTCTTTCTTTAGTT
pig     AAATGTTTTACTCTGTTCT-----GATGCATGAGA--C-TAATAATCTTTCTGATGCTCTCATTTTAGCT
horse   AAATGTTTTA---TGTTCT-----TTTGCATGAACAG-TAATAATCTTTTGAATGCTCTTACTTTAGCT
microbat TAA--GTGATTTATGTTCT-----TCCGTATGAGATGC-TAATGTTCTTTCCAAAGCTCTGACTTTAGTT
megabat AAATGTATTA---TGTACT-----TGTGCACAAGATAC-TAATAATCTTTCCAAAGCTCTTACTTTAGTT
dog     -AAAGTTTTATATGTTTT-----TATGTGT--GACAC-TAATA---TTCTAACCCCTCTTACTTTGGGT
panda  --ATGTTTTATATGTTTT-----TATGTGTGACAGACTTAATAATCTTTCTAAAGCTC-----TGGTT
shrew  TAAAGTTTTATATGTTTT-----TGTGTGTGTGATAC-TGATAGTCTCTTAATGCTCTCACTTCAAGTT
hedgheg GAAATGTTTTTTTTCTTTCTTTTTTAAATGTACTTGGGATAC-TAATCTTCTCAAGCATCCITTTCTTTGGTT
human  AAATGTTCTATATATACT-----TATGCATGAGATAC-TAATAATCTTTCTAAATGCTCTTATTTGGTG

```

#41443 (cetartiodactyla+carnivora+chiroptera) - (perissodactyla)

```

cow      GAAAGAAACAGCCATAATG-AAATATGACAACTCAG-CCGAGCCCTCAGATACTACTATGT-GAAGGTAATACACGTCC-----ACCTCGAAA-CAAAATTTGTTCCCTTC-----TCCTCTGTTGAGGTTAG--ACATACTAATGT-TGTGGTTTGTTCAGTTATTAAAGTAA---CITTTTAAITGAGGTTAATTTGA
alpaca  GAAAGAAACAGCCATAATGAAATTTATGACAACTCAGCCCGCCCTCAGATACTAATTTGAAAGGAAATACGCTCCC-----ACTCAAAGA---CITTTCCCTCT-----TCCTCTGTTGAAAGTAGG-GGGTACTAATGTCCCTGGTTTATTTATTTTAAAAAGAG-TTTTTTAAATGAGGTATATTTGGA
dolphin GAAAGAAACAGCCATAATG-AAATATGACAACTCAG-CCGAGCCCTCAGATACTACTATTTGT-GAAGGTAATACACATCC-----ACCTCAAAA-CAAGAAITGATCCTTC-----TCCTCTGTTGAGGTTAG--AGGTACTAATGT-CCTGGTTTATTTATTTAAAAAGAAATTTTTTAAATGAGGTATATTTGA
cat     GTAAGAAACAGCCATAATG-AAATACGACAACTCAG-CCGAGCCCTCAGATACTAATTTGT-AAAGGTAATACGATCC-----ACCTCAGAA-TAAGACCTGTC-CTC-----TCCTCTGTTGAGGTTATGAAACTACTCATGT-CCTGGTTAATTTT-----CAAATCTTTTTAAITGAGGATAGTTTGA
dog     GGAAGAAACAGCCATAATG-AAATACGACAACTCAG-CCGAGCCCTCAGATACTAATTTGT-AAAGGTAATACACATCC-----ACCTCAAAA-CAAGAAITG---CTC-----TCCTCTGTTGAGGTTATG-ATGACTAATGT-TCTGGTTTATTTT-----TAAGCCCTTTTTAAITGAGGATAGTTTGA
megabat GAAAGAAACAGCCATAATG-AACTACGACAACTCAG-CCGAGCACTCAGATACTAATTTGT-AAAGGTAACACACATCC-----ACTCAGAA-CAAGAGGTGTT-----CCTTCTGGTAGGGTGT--TAGCTGCAATGT-CCTGGTTTATTTATTTA-----ATTTTTAAITGAGGTATATTTGA
horse  GAAAGAAACAGCCATAATG-AACTATGACAACTCAG-CCGAGCCCTCAGATACTACTACTGT-AAAGGTAATACACATCC-----TCCTCAAAG-CAAGAAITGTTCC-----TCCTCTGTTGAGGTTGT--TGTGCTAATGT-CCTGGTTTATTTT-----
hedgheg GAAAGAAATAGCCAAACTAG-AAATACGATAAGCTCAG-TCGAGCCCTCAGATACTAATTTGT-AAAGGTAATGTCATCTTGATGTTA---ACCTCGACAGAAAAGCTCAAAA-CGAGAACCAATTTCCATA-----CCTTTTGG--GGCTTAT--AGGTGCTAATAT-CCTAATTCATT
shrew  GGAAGAAACAGCCAAACTAG-AACTACGATAAGCTCAG-CCGAGCCCTCAGATACTACTAATTTGT-GAAGGTAACCGTGTCCCTTAAGTACGGCTGCCTATATAGAAACTTCAAAAACAAAATCCCGCCACC-----TCCTCTGTTGAGGTTAC--AGGCTCTACTAT-CCTGGTTTATTT-----
human  GCAAGAAACAGCCATAATG-AAATATGACAACTCAG-CCGAGCCCTCAGATACTAATTTGT-AAAGGTAATACACATCTGATCTTA---TACTATACAGAACTCCAGA-CAAGAACGATTCCTTCTTG/. . . /TTGTTTTCTGTTGAGGTTAT--AGATACCAATTT-CCTAGTTTATTT-----

```

```

cow      C-----ATTATGCTTTGAGTGTACA---GCATAATGATGCAATATTTGTACGCATTGTGAAATGATC---ACTGTTTTGGTT---TAAACTCAAATTTATTTTACAGCTTCAGCAGCTTGGAAATGAAATAAAAGATGTAAA-TGTTCTAAGTGTATTTCTGC
alpaca  CATACAAGATATATATTTGTTTCTGTATACA---GTATAATGATGCAATATTTGTATACATTTGGAATGATC---ACTGTTCTGGTTA---TTTATCCAAATTTATTTTCTACCTTCAGCAGTTTGGAAATAGAGTGAAGATGTAAA-TGTTCTAGCTGTATTTCTGT
dolphin CATAAA--GTTATATTTGGTTTGGGTGTACA---ACATAATGATGCAATATTTGTATACATTTGGAATGATC---ACTGTTCTGGT---TAAATCAAATTTATTTTACAGCTTCAGCAGTTTGGAAATAGGATGAAGATGTAAA-TGTTCCAGGTGTATTTCTGC
cat     CCTACAGCAATATATTCGTTGAGGTGTACA---ACATAACGATTCGATGTTTGTACGTTTGCAAAAGCTCACAGAGCGCTTGGATATTTTGTATTCAGTTTATTTGATAACTTCAGCAGTTTGGAAATGGGATGAAATGTATAAG-TGTCCAGCTCTATTTCTGC
dog     CATATAACATATATATGTTTCAAGTGTACA---GCATAATGATTTGGGATTTGTATACATTTGCAAAAATGATC---ACTGTTCTGGTTATTTCTGATGATTTATTTTAACTTCAATTTTATTTATAGCTTCAGCAGTTTAAAGTTAGGATGAAAATGGAAA-TATTTCACTGTATTTCTGC
megabat AATATA---ACATAGTTTTAGGTATATATTTAGGCAATGATTCAGTATTTGTTTACATTTGGAATATC---ACTATCCTGGTTTTATTTTAACTAATTTTATTTATAGCTTCAGCAGTTTAAAGTTAGGATGAAAATGGAAA-TATTTCACTGTATTTCTGC
horse  AATATA---ACATAGTTTTAGGTATATATTTAGGCAATGATTCAGTATTTGTTTACATTTGGAATATC---ACTATCCTGGTTTTATTTTAACTAATTTTATTTATAGCTTCAGCAGTTTAAAGTTAGGATGAAAATGGAAA-TATTTCACTGTATTTCTGC
hedgheg AATATA---ACATAGTTTTAGGTATATATTTAGGCAATGATTCAGTATTTGTTTACATTTGGAATATC---ACTATCCTGGTTTTATTTTAACTAATTTTATTTATAGCTTCAGCAGTTTAAAGTTAGGATGAAAATGGAAA-TATTTCACTGTATTTCTGC
shrew  AATATA---ACATAGTTTTAGGTATATATTTAGGCAATGATTCAGTATTTGTTTACATTTGGAATATC---ACTATCCTGGTTTTATTTTAACTAATTTTATTTATAGCTTCAGCAGTTTAAAGTTAGGATGAAAATGGAAA-TATTTCACTGTATTTCTGC
human  AATATA---ACATAGTTTTAGGTATATATTTAGGCAATGATTCAGTATTTGTTTACATTTGGAATATC---ACTATCCTGGTTTTATTTTAACTAATTTTATTTATAGCTTCAGCAGTTTAAAGTTAGGATGAAAATGGAAA-TATTTCCGCTGAATCTCTAC

```

#42785 (carnivora+perissodactyla) - (artiodactyla)

```
cat GATTGTGTTGTATAGTAACTAAAAACAAGGAAAGCATAAATGCCACTGGAGGCATAT---AATGCTG-ACCATGGGAGTTTAGAGA-----TAACCTTAAGCTAGATCGTTTTTTGTTTTT-----CATTGAGATATAATTGACGCCAACAGTATACACTCCAGGTGTACGACATAACGATTCGATATTTGTATATGTTGTAATGATCACCACAGTA
dog GATTGTAGTATAAAGTAACTAAAAAAAAGGCAATAAATGCCCTGGAGGAAGTAT---AATGATGTGCAATGGAAGTTTAGAGA-----TAACCTTTAGCTAGATTGTTTTTTGTTTTTTTAAATGAGGTAATAATGACACAAACAGTATATACCTTTAGGAATACAGTGAATGGATGTTTGTATATGTTGCAAAAATGATCACCACAGTA
horse CATTTGTA-ACCTATAGTAACTAAAAAAAAGGCAATAAATGCCA--GGGAGAGGTACAAAAGAAATGATGTGCCAGGGAAGTTTAGAGAAATAGAGAGGTGACTTTTTAGCTAGATTGTTATTTTTGTTTT-----AATTGAGGTAATTTGACATATATTT-----AGTTTCAGGTGTACAAACATAATGAT--GATATTTGTATATTTGCAAAAATGATCACCACAGTA
cow GATTATA-TGTATAGTAACTAAAAAAAAGGCAATAAATGCTG-TAGGAGAGCTGT---AATCATGTGCCCTGAAAGCTTAGAGAAAGAGAGATGACTT-----AATTGAGGTAATTTGACATATATTT-----AGTTTCAGGTGTACAAACATAATGAT--GATATTTGTATATTTGCAAAAATGATCACCACAGTA
alpaca GATTGTA-TGTATGTTACTAAAAATAAGGAAAGGCGTAAATGCCA-TGGGAGAGGTAT---AATAATGTGCCCTGAAAGTTTAGAGAAAGAGAGGTGACTT-----AATTGAGGTAATTTGACATATATTT-----AGTTTCAGGTGTACAAACATAATGAT--GATATTTGTATATTTGCAAAAATGATCACCACAGTA
dolphin GATTGTA-TGTATAGTAACTAAAAAAAAGGCAATAAATGCCA-TGGGAGAGGTAT---AATGATGTGCCATGGAAGTTTAGAGAAAGGAAAGATGATTT-----AATTGAGGTAATTTGACATATATTT-----AGTTTCAGGTGTACAAACATAATGAT--GATATTTGTATATTTGCAAAAATGATCACCACAGTA
human GAGTGTG-TATATAGTAACTAAAAATAAGGAAAGGCAATAGTGCCA-CAGGAGAGGTATA---AATGATGTG---TGAAGTTTAGAGAAAGGAGAGATGACTT-----AATTGAGGTAATTTGACATATATTT-----AGTTTCAGGTGTACAAACATAATGAT--GATATTTGTATATTTGCAAAAATGATCACCACAGTA
```

```
cat AATCCAGCTAACAGCTGTCCCATATATAGTGACAAAAATTTGTGTGTGTGTGATGAGATCAGCTAGGTTTGTTCAGTGAAGTTTCATGAAGGAAAGTTGATTTGAAATGGGCCCTGAAAAATATGTCAGAGGTAGGCGTT
dog AGTCCAGT---AGCTGTGCCATACACAGT-----TATGCCCTTTCTATTAGCTAGG-TGTTCAAGTGGAAAGTTTCATGAGAAAAATTTGATTTGCAATTAAGCACTGAAAAATACGTAAGATGTAAGCATT
horse AGTCCAGTTAACATCTGCCACCATACATGGT--TAACAATTTTTTTTTCTATGATGAGATTAGCTAGATTGTTAGTGA AAAATTCATGAAGGAAAGTTGATTTGAAATGGGCCCTGAAAGAAATGTCAGAGATGTA-ACGTT
cow AGTCCAGTTAACATCTGCCACCATACATGGT--TAACAATTTTTTTTTCTATGATGAGATTAGCTAGATTGTTAGTGA AAAATTCATGAAGGAAAGTTGATTTGAAATGGGCCCTGAAAAATATGTAATAATGACGCTT
alpaca -----TTAGCTACATTTAGTGGAAAGTTCTGATGGAAGCTGCAATTTGAAATGGGCCCTGAAAAACATTAAGATGATGATATT
dolphin -----TCAGCTGCACTGTTAGTGAAGCTTTTCATGATGGAAGTTGGGTTTGAATGGGCCCTGAAAAATATGTAATAATGATGACATT
human -----TTAGCCAGATTGTTTAGTGAAGTTTTATAGAGGAGATGGTATTTGAAATGAAACCTGAAAAATATGTAAGACATACATATT
```

#44900 (carnivora+perissodactyla+chiroptera) - (cetartiodactyla)

```
cat CACCTTAACTTCAGTACACAGTGCAA--ACCTGTGCAACTATGTGTGGCAATCCTGGCAA-----TTTTCTTAAAAAGTAAAGAAAAAATTTGTTGAGATATTATTGAC-----GTATTAATTTTCAGGTGTACAAAG---TGATTCATATATGTATGACTGCAAAATGGTCCCTGTGATAAAT---CCAAGTCCATCAACACACATAATTT---
dog CACCTC--TCAGAGTTATACAGTGCACC--ACCTGTACAACCTGGGTGTGGCAGTCTGGGAAAGGAGCAGTTTTTTTTTAAATTAAGAAAAAATTT---TTGAGATACAAATTAACA--TAACACTATATAATTTTCAGATACACAACATAATGATTTCA---TATATATGTTGCAAAATGGTTCACCAATAAATC---TAAACATCCATTATCACACATAGCTATAGT
horse TACCTC--TTACAGTTGTACAGTACATC--ACCTGTACAACCATATGTGGCAGTCTGGGAAAGGAGTAGTTT---TTAAAAAATAAAAAAATATTTTATTGAGATATGATTCACATATAACATATGCTAGTTTCAGATGTACAAACATAATGATTTGAGGTTTGGGTATAATGCAAAATGATCCCCACAATAAGTCTAGTTAAACATCCATCACCACGCATAGTTACAAA
megabat CACCTC--TTAGAGTGTGCAAGTGTACC--GCCCGCAACCTGTATGTGGCCCACTGAGAAAGAGTAGCTT-----AAAATTTTTAAAAATTTTAAATGAGATATAATTTGATATCTAACATTCCTTAGTTTCAGGTGTACAAATGTAATGATTCAATTTTGTATATGTTGCTAAACGATCCTCAAAAATAGTCTAGCTAAGAAAGATCACCACACTTAGATAAAAA
cow CAGCCC--TTAGATTTACAGGAGGCA-C-ACCTGTGCAACTGTATGCGACAGTCTAGAAAAGG---AGTGT-----AATTTTTTAAAAATTTTAAATGAGATATAATTTGATATCTAACATTCCTTAGTTTCAGGTGTACAAATGTAATGATTCAATTTTGTATATGTTGCTAAACGATCCTCAAAAATAGTCTAGCTAAGAAAGATCACCACACTTAGATAAAAA
alpaca CATCTC--TTAGATTTGCGCAGTGCA-C-ACCTGTGCAACTGTATGTGGCGGTCTAGAAAAGAGTAGTGC-----AATTTTTTAAAAATTTTAAATGAGATATAATTTGATATCTAACATTCCTTAGTTTCAGGTGTACAAATGTAATGATTCAATTTTGTATATGTTGCTAAACGATCCTCAAAAATAGTCTAGCTAAGAAAGATCACCACACTTAGATAAAAA
dolphin CACCCC--TTAGG---GCACAGTGCA-C-ACCTGTACAACCTGTATGCGACAGTCTAGAAAAGAGAGTAGT-----AATTTTTTAAAAATTTTAAATGAGATATAATTTGATATCTAACATTCCTTAGTTTCAGGTGTACAAATGTAATGATTCAATTTTGTATATGTTGCTAAACGATCCTCAAAAATAGTCTAGCTAAGAAAGATCACCACACTTAGATAAAAA
hedgehog TACCTC--TTAGAGTTATGAAATGCAAC--ACCTACATAACCATATGTGGCAATCCCAGAAAGGAGAGCTT-----AATTTTTTAAAAATTTTAAATGAGATATAATTTGATATCTAACATTCCTTAGTTTCAGGTGTACAAATGTAATGATTCAATTTTGTATATGTTGCTAAACGATCCTCAAAAATAGTCTAGCTAAGAAAGATCACCACACTTAGATAAAAA
shrew CGCCCC--TCAGAGCTCCAGGGGGGCTAGCTGCAACCCAGGTGTGGCCCTGCTGGAATGCTGGTCT-----AATTTTTTAAAAATTTTAAATGAGATATAATTTGATATCTAACATTCCTTAGTTTCAGGTGTACAAATGTAATGATTCAATTTTGTATATGTTGCTAAACGATCCTCAAAAATAGTCTAGCTAAGAAAGATCACCACACTTAGATAAAAA
human -GCATC--TCAGATCTACACAGTGTACC--GCCTATACAGCTGTCTGTGGTAGTCTGGGAGGAGGTAGTT-----AATTTTTTAAAAATTTTAAATGAGATATAATTTGATATCTAACATTCCTTAGTTTCAGGTGTACAAATGTAATGATTCAATTTTGTATATGTTGCTAAACGATCCTCAAAAATAGTCTAGCTAAGAAAGATCACCACACTTAGATAAAAA
```

```
cat ---TTTTCT---TGTGATGAGAACTTTTCAGTCTACTCACTTAAACAATTTCAAATCTGCAACACAGCATTATTAACGTAGTTAATAGGAGCTGCTTTTAAATCTCCTTTAGAAATGAAAGTTAGCCTAAATCCAATGGTGTCTCTTTCTTGT--CTGGTCT
dog TTTCTTTTTCT---TGTGATGAGAACTTTTAAAGTCTGCTCACTTAAACTTGCAGATATGCAATACAGTATTATTAACATAGTTAAACGGGAGTTACTTTTAAAGTCTCCTTCGGAAGAGAAAGTTGGCATTAAACACAA---TGTCTCCTCCTTGT--CTAATCT
horse T---TTTTCT---TGTGATGAAACGTTTAAAGTCTACTCTCTAGCAAAATTTCTAATATATAATACAGTATTACTAAGTAAATATA---GTAGTTTTTAAATCTCCTTC-GAAGAGAAAGTTGG-ATTAATACAAATGTTGCTCCTCTTTGTTCCCTGATCT
megabat CTCTTTTTTTTGTGTGTGACAAAGACTT-----TTAGCAAATTTCAAATATATAATAGAGTATTATTAACGTGCTGTTAAACAGG-GTAGTCTTAAATCTCCTTTGGAAAGAGAAAGTTGGCATTAAATCCAATGTCATTTCTCTTTGTTCTTT-ATCT
cow -----TTAAATCCTCTTTGGAAAGAGAAATGACATTAAACCAATGTTGTTCTCTTTTCCATTTCCTGATCT
alpaca -----TTAAATCTTCTTTGGAAAGAGAAAGTTGGCATTAAATCGAATGTTGTTCTTCTCCCATTCCTGATCT
dolphin -----TTAAATCTTCTTTGGAAAGAGAAAGTTGGCATTAAATCCAATGTTGTTCTCTTTCCATTTCCTGATCT
hedgehog -----CTAGAGCTCTTTGGAAAGAGAAATGAGCATTAACTGAAAGTATCTCCTCTTTGCTCCTCTCT
shrew -----TTAGGTTCTCTTTGCTGGGAAATTTGGCATTGATCGATGGTCTCTTCTCTCTGTCCTCTGATCT
human -----TAAATCTCCATTTGAAATGAAAGTTGGCATTAACTCATGTTGCTCCTCTTACTTCCCTGGCCT
```

#75125 (carnivora+perissodactyla) - (chiroptera, cetartiodactyla)

cat GGCACAGGAGAGGGGACTTCCAGGCCACATCTCCGGTAAAGCAC-----CAGGCAG-----ACATGGGTGCTTCTGGGCACCTG-CITTTACTCAGTGA-TGCCGGCAGGGAGGTCCATGAGGAAATGTCAGCCAGGGAAATCTGAGAAATGCCCTTATC-----CATTTTCGACAAATCCTTTGGTCTCACTGTCTCTCCTAT  
dog GGCACAGGAGAGGGAACTGCACCAAGCCACATCTCCGGTAAAGCAC-----CAGGCAGACTACCAGGAAAAACAGAGTCTTCTGGTACCTG-CITTTATTCACTGA-GGGATGGAGGAGATCCATTAGGAAATGTCACCCAGGGAAATTTGAGAAATGCTCCCTCTC-----CATTTCTCACAAATCCTTTGGTCTCACTGTCTCTCCTCTGT  
horse GGCACAGGAGAGGGAACTTCCAGGCCACATCTCCGGTAAAGCAC-----CAGGCAG-----ATGCGAGTGTCTTGAATATCT---CTGTCTAGTATTGGGATGGAGGAGATCCATTAGGAAATCA-CCAGGGAAATTTGAAAT--TCGTTCTCTTTCACTGCCCTTCTTTCTCACAAATCCTTTGGTCTGATGTCCCTTC----  
microbat GGCACAGGAGAGGTGGATTTCCCAAGGCCACATCTCCGGTAAAGCAC-----CTGCA-----TCATAAGTCTTCTGATAGTGG-CTATTCTCAGTTATTGGATGGAGGGGATCCATTAGGAAATTTCCACCAAGGAAATAT-AAAAATGCTCATTCTCTTTCACTGTCCCTCACTCTGACACATCTTTGGTCTCACTGTCCCTTC----  
cow GGCACAGGAGATCGGAACTTCCAGGCCCTTCTCCGGTAAAGCAC-----CAGGCAG-----ACAGAAGTCTGCCAGAACTG-CGCTTCCAGCAATGGGATGAATGGATTTTCTTTGGGAAATCTCCACCAAGGAAATTTGGTCTGATGTCCCTTC----  
dolphin GGCACAGGAGAGGAACTTCCAGGCCCTTCTCCGGTAAAGCAC-----CAGGCAG-----ACACAAGTCTTTGAGAACTG-CTCTCTCAGTATTGGGATG-ACAGAGATCCATGAGGAAATCTCCACCAAGGAAATCTGAAATGCTCTTTCTCTTTCACTGTCCCTCACTCTCAAAATCTTTTGGTCTCCTGTCCCTTC----  
shrew GGCACAGGAGAGGGGATCAGCCCGGCCCTCCGGTAAAGCAC-----AAGGAAAGTCTTCCAGGCACCTG-----CGGATGGGTGGGACGGCCAGGGGAAAC-----ATGCTGTCAGCACTGCCGCGCCACTGGCTCAGCGCCCTGAGTGGAGAAATCTCTG-----  
human GGCACAGGAGAGGGGCTCCACAGGGGCTTGTGAGGTGAGCGAGCC--CAGGCAG-----AGAGCGGTGCTGTACTCTACTTATTAGTACTGAGTGGGTGGAGGAGGTAGGTTAGGAGTGTCCACCAAGGAAATGAGAGATGCTCTTCTCTTTTGGCCATCCATTTCTGACAAATCTTTTGGTCCACACACTCTTC----

cat GTATGATGCTGTGTTTTTCTTTTCTTCTTTTATCTATCTGCTGACTGACTTACTCAGTATTGGTTTACTTACTTCCACTGAGATACTAAGTGTGTAGTTTCAGGTGTAACAACATAGTACTCAATATTTGTATGATTGCAAAATGATCAC-----CACAGTAAATCT  
dog GTTGTATATGTTTCTTCTTCTTCTTCTTCTTCTGCTGCTACGATTCATTTGCCAATTTACTTACTGTT-----TTGAGATGTAAGTACTGACATGATACCAATGTTAGTTTAAAGTATACGACATAATGGAAAAAAAAGTATACGACATAATGGTTCATGTTTGAACCATTATGATGATCACCATGTTTAAATGGATCACCATGTTTAAATGGATGTTTAAATGGT  
horse -----TTGAGATGTAAGTACTGACATGATACCAATGTTAGTTTAAAGTATACGACATAATGGAAAAAAAAGTATACGACATAATGGTTCATGTTTGAACCATTATGATGATCACCATGTTTAAATGGATCACCATGTTTAAATGGATGTTTAAATGGT  
microbat -----ATCTTTACCTAT  
cow -----  
dolphin -----  
shrew -----  
human -----

cat GATTAACATCCGTCACCACACA-GGTACAAAACAATTTTTTCTTGTGATGAGAACAATTTAAGATTACTGTCTTAACTTTTTGTTAAATTTATTTTGGAGAAACGAGTTGGGGAGGGGTGGAGAAACGCTGAGGGAGAGAGAAATCCCAAGCGACTCTGCACCCCTCAGTGCAGAGCCGACGTTGGGACTTGATTCCATGAACGATGAGACCATGACCTGAGCCGAA  
dog GATTAAGATCCATCACCACAGA-GTTAGAAAAATATTTTTCTTGTGATTAGAACAATTTAAGATTACCCTC-----  
horse AGTTAACGTCAATTTACCACACATAGTTACAAAATTTTTGTTGTGTGTGATGAGAATTTTTAAGGTTTACTCTC-----  
microbat -----  
cow -----  
dolphin -----  
shrew -----  
human -----

cat ATCAAGAGTCAGACATTTAACCCAGCTAAGCCACCCCACTCCCTCTTAGCACTTTTCACTATAATACAGACTTTAATAATATAGTACCATGCTGTACCCCTCAGCC--AGGACTTACTTGTTCCTCAACTGGAAATTTGACTTTTGAACCCCTTAC-----ACCTATTTTGGCCACCCGCCACTCTGACAAACATCA-CAGTCTGTTCTGTATCCACA  
dog -----TTAGCAACCTTCACTGCAATTAACAAATTTAATACTATAGTACCATGCTGTGTGTTACATCCCCAGGGCTTACTCTTTTATAACTGGGAGT---TACCTTTTGAACCCCTTAC-----ACCCACATCCACCCACCCCTCTGACAAACCCACCAATCTGTTCTGGGTATCCATG  
horse -----AGCAACTTTCAAAATACGAGTACAATGTTAATACTATAGCCATCAGGCTGACTTTTATCCCTAGGACTTATTTATTTTATAACTGGAAATTTTACTCTTTTGAACCCCTTACCAATTTCCACCCACCCCTCCTCTCCACCTCTGACAAACAT---CAGTCTGTTCTGTATCTGTG  
microbat -----  
cow -----  
dolphin -----  
shrew -----  
human -----

cat AGCTCAGTCTTTTGTGTTTTGTTTT---GTTTTGGGTGGTTGTTTTGTTTTGTTTTGATTTAGATTTACATAGAAAGTGAAGTATGACAGTCTGTCTGTCTGTCTTATCTAGCAATATGCCCTCAAGACCCACTGTGTGGTTGAGTGGGAAAGATTTCCCTCTTTTTATTTTTTACGGCTGAATAATAATCTACTGTGTGTATGTC---CACATTTTCTTTAT  
dog AGCTCAGTCTTTGTTTTGAGTTTTTTTTGGCGGGCTGGGGGAGGTTTTGGTTTTGATTTTGGATTTCCAGATTTCCACACTGAAGTGAAGATATGATACGTTCTTTTGTCTTATCTTACTTAGCAATATGCTCTC-----TATCTCTGTTGCCAAAAATGGGAAATTTCCCTTTTTTATGGCTGAATAATAATCTACTGTGTATATAT---TACATGCCATGTTTTCTTTAT  
horse AGCTTGGTTTTGCTTTGTTTTTTTTAAGATTTCCACATATAAGTGAAGTCAATCAATCTTCTT-----TCTCTGTCTGACTTATTGCACTTAGCATAATATGCCCTCAA---GTTCCATCCGTTTTGTCAGAAATGGCAGGATGTCCTTCTTTTTTACGGCTGAATAATAATCTACTGTGTATATATACCAATTTCTTTTTCCAT  
microbat -----  
cow -----  
dolphin -----  
shrew -----  
human -----

cat TCATCTGTCAAAGGACACTTAGATTGATTCCA-TACCTCGGCTATTGTAATAATGCTGCTGTGAACGTTGGGGGTGGGATATCTTTCAAGGTAGTGTTTTTGCTTTCTTTGGGTAATCCCCAGGAGCAGAAATGCTGGGCTTGTGTAAATTTGACCTGTCCAC--ATGAG--CTTTGTCATTCTTTTCACTGTGACCCCTGATTTGATC-CTTCTGTT  
dog TCATATAATGAGGAACACTTAGATTGCTTCCATTGCCCTGACTATTGTAATAATGCTGCTGTGAACATGGGAGTGGGATATGTTTTAAGGTAGTGTTTTTCAATTTCTGGGTAATAATAGCCAGGAGCAGAGTTTTCTGGG---GTCAATCAAACTTGACATGCTAC--ACGAG--CTCTGTCCTTCTTTTCAATTTCAACATTTCTGGTCACTACTCTTTCTTT  
horse TTTATCTTTCAAAGGACACTTAGATTGTTCCA-TATCTTGGCTACTGTAAATAATGCTACAAGGAACGTAAGGTTGCAAGATATCTTTTGAATTTACTTTTTGTTTTCTTTGGGTAATAATAGCCAGGAGTGGAAATTTGATAGGCTTATTTAAATGTCACATGTCAC--ATGGTCTTTTCCCATTTCTCTGACTTAAACATTTCTGATCATATTTCTTCTGTG  
microbat -----ACCTTTAAATTTGACATGTCAC--ATGGA-ACTTTTTTCTATCTTTTAAATCAACATTTCTGATTAATTTTTTCTTC  
cow -----ATCTTTAAATTTGAGGTGGCCAT--GTGGGCTTTTGTCCATTTCTTCTCAATTTCAACATTTCTGGTCACTACTTTAATC  
dolphin -----TCTTTAAATTTGACATGTCACAAATGGGTTCTCTGTCCTTCTTTCCACTCTCCTACTCCTNNNNNNNNNNNNNNNNNNNNNNNNNNNNNN  
shrew -----TCCCTTAAATTTGACATGTCACAAATGGGTTCTCTGTCCTTCTTTCCACTCTTTCTCATATTTGATGTTTCTGATCATCCGCTTTCTGT  
human -----TGACTTTCACTTCCCATTTATTTGGGCTCTTTGTCCTTCTTTCTCATATTTGATGTTTCTGATCATCCGCTTTCTGT

cat GTTATCCGTGTT  
dog GTTATCACTGTC  
horse ATTATCAACGTC  
microbatATTAAATGTTG--  
cow ATTATCAATGTC  
dolphin NNNNNNNNNNN  
shrew -----  
human ATTATCAACATC

B-1060 - L1MC5 (*carnivora+perissodactyla+chiroptera*) - (*cetartiodactyla*)

```
dog      ----TGTCTAGTGATATCATTAGCATATATTTGGAGTACACCTAATATCTAAATAAGCTTATTACAGTATCACAAAATCTCTCTAGAATGGCTGTTAGTTTATATTTTCCCTAACAGAGCAGAGGGCTTTTCATCCCTGTTTCCCTACCAAGTGTGGCATTATCTAACTCTCAGCATTTTCC-----AGTACAGAGTAAACATATCA---CTG
panda   TATTTGTCTAGTGTATCATTTAGTATATATTTTGGGGTACAGCTGATATCTAAATAAGCATATTAATAGTATCACAAAATCTCTCCAGAATAGCTGATCAGTGTATATTTTGTAGC-AGAGCAAAAGGGCTTTCTTTTCTCCCTGTTTCCCTACCAACATTTGGCATTATCTAACTCTC--ATGTTTTCCAGCCTAGTAGGTATAGAGTAAACGTATCGCTGCTG
microbatTATCTGCTCTGTGATATCATATAGTAT-TATTTCTGGGTAAGCTAAGTCTCAGTGTGCATATCAGCAGTTTCTGTAAGGTTCTCTCCAGAATGGCTGGACTCGTTAAACATTTCACTAGC-AGAGCAGGAG--CTCCCTCTTCCCTGTTTCCAGCA--CATGCGGCTTATCCAATTTCTTATGTTTCCC-GTCTCATGGTTATAAAGTAAATGTGAGTGTAT
horse   TATTTGTCCAGTGGTATCATTACTATATATTTCTGGGGATAGCTAATATCTAAATAAGTGTATTAAACAGCATCAGCAGTGTCTTCCAGAAGGGCTGCACCGGTTTATCTTCTCACCCAGC-AGAGCAGGAGGGCTTCTGATCCCTGTTTCCCTACCAAGCATCTGGTGTAACTAACTCTTATGTTTTCCAGTCTAAATAGGTGTAAAGTATAGTATCAGTACTG
cow     TATTTGTCTAGTGTATCATTTAGTATACATTTCTGAAATAGCTAAGAGCTTAAATAACATGTTAAACAATTAACAGGGTA-----
dolphinT-TTTTGTCTAGTGGTATCATCTAGTATACATTTCTGGGTATGGCTAAGAGCTCAAAAATACATATTAACAATGTAAACAGTG-
alpaca  A-TTTGTCTAGTGTATACCAATTTAGTATACATCTCTGGGTAGAGCTGAGAGCTCAGTAAATGCATATTAACATTAACACATGG-----
pig     TATCTGTTTGTAGTGGTATTTTGGTAAACCTTTTGGGTATAGCTAAGAGCAAAATACATATTA--TGTAAACCTG-----
mouse   TATTTGCCAGTGACATCTTTTA-TATACATTTCTAGACAGAGCTTGGTT---GGGATACATCTG-----AAACACA-----
```

```
dog      TTTAAATTTGCTTACTGTGATTATTA-----TCTTCAAATGCTTGTACTTTTTTT-----TTCGTGAAGTCCAGTGCATGGCCTTTGTGCAATTTTCTGTAGCAGTTGCTGCTGTTTTGTT-ATTGATTTGCAAGGGATCATTGTATATTTTGGATATTAGCCCTGGTTGGTTACAGACAATGC---AGATATCTTCTCCCATTTCTGTT
panda   TTTATATTTGCTTACTGTGGTATTA---GTTTGATTACCTTCTTCAAATGCTTGTACTTTTTTTGTT-----TTCGTGAAGTCCATGCTTGGCCTTTG-----GTTGCTGCCITTTTGT-ATTGATTTGCAAGGGATCATTGTATATTTTGGATATTAGCCCTGGTTGGTTTACAGACAATGC---AGATATCTTCTCCCATTTCTGTT
microbatTTTCCATTTGCTTACTGTGATATATTGAGTTTCGATTATC-TTTCAGATGCTTGTGTCGTTTTTGTCTTCTTATGTAAGTCCATGTTTATATCTTTTGTGCGTTTTTCTCTAGAGGTTGCTGCCITTTTGTAAATGATTTGAGGAGTTGGGTTGATATTTTGGATATTATGCTGGCTGGTTTTAGACAATGCCAATAGTACCACCTCTCATTTCAAGT
horse   TTTCAATTTGTTTTACTCTGACAATATTGAGTCTGATTATC-TCTTCAGGTTGCTTGTCTTTTTCTGTTGTGCTTCTGTAAAGTCTGTGTTTATGCTTTCTGTCATTTTTCTCTAGGAGCTGCTGCCGTTTTGTT-ACTGATTTGCAAGGATCATTGTATATTTTGGATATTATCCCTGGTTGGTTTTAGACAATGC---AAATATCTTCTCCCATCTTTT
cow     -----
dolphin-----
alpaca  -----
pig     -----
mouse   -----
```

```
dog      ACCTGTTTAAAGAGTTGTCATGGTCTACTTTAAAA--AAAAAATCTTTAAATTTTGTATGTAATGAAATAAATAATTTTCCATTATGGTTTTAGAAAT--GTGTATAGAGAAAGTCTCTCCCTGTCATGGTACAGACATAAATCTGACGTTTTATTCTATTATTTTTAAAGTCTTACATTTCTCTTATGGCTTCAGCTCAACCTGCTGTTATATATGGC
panda   ACCTGTTTAAAGAGTCCCATGGTTACTTTGTTT--AAAAAATCTTTAAATTTTGTATGTAATGAAATAGTA---TTCCTCAATTTGTTTTGGGATTT--ATATATAAAGAAATCCCTTTTGTCCATGGTACAAACATAAATCTACATTTTATCTATTAAATTTAAATCTTCACATTTCTCTTATGGCTTCAACTCAGCCCTGCTGTTTTATGTTGTT
microbatATTGTTTTAAAGAGTCCCATGGTCTACTTCTGTTTT--AAAAACATCTTTAATGTTGATGTAAGGAAATAAATAGAAATATCTCATTA-GGTAATTTGGGGTTTCATAT-TTAAAGTCTTCCATCTTGGTCACAAAATAAATCTTATATTTATC--CTTAACTAAAGCTTTAC-TTTTTTTTTTATGACTCAACTCA-GCTGCTGTTTTATATGGC
horse   ATTTGTTTTAAAGAGTTGCCAGGGTCTACTTTGTTAAAAAATAAATCTTCAATTTTGTATATAATGAAATAAATAAATTTTCTTTATGGTTTTGGGGTTCTTATATAAAGAAAGTCTTCTGCTCTGTCACAAAAGTAAATCTTACGTTTTATTCTATTAAAGTTAAAGCTTACATTTCTTTTATGGCTTCAACTCA-CCTGCTGTTATCTATGGC
cow     -----
dolphin-----
alpaca  -----
pig     -----
mouse   -----
```

```
dog      ATTAGAACAGGATCCAGTTTTACTTTTTCTTATATAGTGAAGCTATTTTTTT---CTAATAGCTATTGAGTAAATCCATAATCCTTCCCATCAAATCTTATTAACA---ATATAATATGCG--TATTCCTCAAATCCTTATTTTACATAT-----TCTATGCATTTCTTTCCCT
panda   ATTAGATCAGGATCCAGTTTTATTTTTTTTTATATAGTGAATTTATTTTTTCTAATAGTATCTGTGTAATAATCCATAATCCTTTCTGTTCAAATACATATTAACA---ATATAACACATG--TATTCCTCAAATCCTCATTTTATATAT-----TGTATACATTTCTTTCCCT
microbatATTAGGTCAAGACCCAGTTTTATTTTTCTGTTATATAGTGAAGCAATTTTTTTT-CTAATAACACCTATTAATAAATAAATAAACAACAGTGTGTTCTTAAAGCCTCATTTTATATAC-----TGTATATGTTTCTTTCCA
horse   ATTAGGTCAAGATCCAGTTTTACTT---ATGTATAGTGAAGAAATTTTTTC--TAATAACACCTATTAATAAATGCATAATCCCCCTC---AAGTCATATTAATA---ATATAACACATGATATTCCTTAAATCCTTATTTTATATATGATATATACACACACACACATTTCTTTCCCT
cow     -----TATTCCTCAAATCCTCATGCTACATG-----TTGATACATTTCTTTCCCT
dolphin-----TATTCCTCAAATCCTCATTTACATA-----TTGATACATTTCTTTCCCT
alpaca  -----GATTCCTCAAATCCTCATGTTACATA-----TTGATACATTTCTTTCCCT
pig     -----TATTCCTCAAATCCTCATTTACATA-----TTGATACATTTCTTTCCCT
mouse   -----TGTTCACAATTTCCCC--TTATATAAGT-----TGTTTGCATTTCTTTCCCT
```

B-1676 – L1MA9 (*carnivora+cetartiodactyla+chiroptera*) - (*perissodactyla*)

```

cow      TTTCAAATCCCTAACCTTGAATGCAGGGTCCTGCCCTGTTGACACCGCATGCTTTGTTG-----TGTGTGTGTGTGTGTGTGTGTGTGTGTGTGTGTGTGTGTTTAAATTGAGGTATAATTGATACAACAT----TACCTTAGATTCAGGTGTACAACCTTAATGATTTGGTATTTGTATACATTGCAAAATGATCACCAACAACAACAAATAAATCCCACGAT-ACTCT
dolphin TTTCAAATCCCTGACCTTGAATGCAGGGCCCTGCCCATTTGACACGACAGAAATGCTTCT-----TTTTTTTCTTTTTGTTGAAGTGTAGTTGATGTAACCTTAGAGTACCTTAGAGTCAGGTGTACAACCTTAATGATTTGGTATTTGTATACATTGCAAAATGCAACCA-----CAATAAATCCCATGATAACTCT
alpaca  TTTCAAATCCCTGACCTTGAATGCAGGGCTCGGTCCCATTTAGCCATGCAAAAGGAACCTCTT-----TGTTTTCTTTTTATAGAGGTATAACT-CTATAGCAT----TATATTAGTTTAGGTGTACGACTTAATGATTTGATATTTGTATACATTGC-----AAGTAAGTCCCACTATACTTT
megabat TTTCAAATCCCTGACACAGAAATGCTGGCCCTGCCGATTTGACCGTATAATA-----ATTCTTTTTTTTTATCGAAGTATAAGA-----CATATTAGTTTCAAGTATACAGTATGATTTCAATATTTGTATATTTGCAAAATGATCA-----CAAGAAATCCCACTGATATT
micro   TTTCAAATCCCTGACACGAAATGCAAGTCCCTGCCCATTTGGCATCACACTAA-----CCTTTTTTTTAAATGAGGGTAAATTAACACAACAT-----TATATTAGTTTCAAGTGTACAATAAAGGATCAATATCTGTATATTTGCAAAATGATCACCA-----CAAGAAATCTACACTGACTCT
dog     TTTCAAATGCCGTGACAGTGAATGC-6AGCCCTGCCCATTCGGACCGCACTAACTCTTCTTCTCCTTCCCCCCCCCTTCTCCTCTTCTCTTTTTTTCTTCTTCAAGTATAGTTGACATGACAT----CACGCCAGTTTCAGGGGTACAATGTAATGATTCACATTT-----GCAGACGTTCACCA-----CAGTAAGTCCCATGCTAACTCT
panda  TTTCAAAGCCCTGGCAGTGCATGCAGGGCCCTGCCCATTTGGACCCCTGGTAACTCTTCTT-----CTTTTCTTCTCCTCCCCTTTTATTTCTTCAAGTATAATTGACATAACATTA---TATATTGGTTTCAGGTGTACAATGTAATGATTCAAATTTGTATATTTGCAAAATGTTCACCA-----CGATAAGTCCATGCTAACTCT
horse  TTTCAAATCCCTGACACTGCATGCAGGGTCCGCCCAAGTTGGACTGGGC-----
human  TTTCAAATCCCTGATATTGAATGCAGGGCCAGCACCATTGGCACTGCAC-----

```

```

cow      TCTTAATCTG-TCTTCCTTTATTCCACCTCTTTGTC
dolphin TCTTTGTTCA-TCTTCTTTATTCTAACTGTTTGTC
alpaca  TCTTTGTCGAGTCTTTTTATTCCAACCTTTTGTC
megabat TCTTAT-----TTCTTCTTAAATCTAAGTCTTGAT
micro   TCTTAT-----TTTTGCTTTATTCCAACCTTTTGAC
dog     TCTTGCTCTT-TTGTTCTTTTTCCAACCTGTCTT
panda  TCTTACT---CTGTTCTTTATTCCAACCTGTATT
horse  TCTTATTCTA-TCTTCTTTATTCCAACCTTTGTT
human  TCTTAT-----TCTTCTTCAATCCAACCTTTTGTC

```



B-1522 - L1M3b

```
cow      CATAGAATACAGAGTTATACATTTTTCAA-----AGAGGCCAACGGATCATGATAGTT-TCTAGAATTGTAATTTCTATTAGAAATCACAGACAAGAG-----TGATGTCACCAAGTTGGAGACGTAGGTTGTTCCCAACTT-GCTTCCCCTTGCAGGA---ACAACCTAACACTATTGAGGGACAGGACACTATTGAAAACAATTCAGA
dolphin CCTAGAATAAAGAGTTATAAAATTTTCAA-----AGAGGCCAACCTTATCTTAATAGTT-TCTAGAATTGGAATTTCTATTGAGAAATCACAGAGACAAGAG-----TGATGTCACCAAGTTGGAGGCATAGGTTGTTCCCAACTT-GCTTCCCCTTGCAGAAAAACAACTAACAACTATTGAGGGACAGACATCATTGAGAA-AATATAGA
pig      CCTAGATTTTCAGAGTTATAAAATCTTGAA-----AGAAAGGAACTG-TCTTGGAAATTT-TATATAATTGAAATTTCTATTAGAAATCCCAGAAAAGGGAAATCCCCTTGTGGCCAAAAATCCACCAAGTTGGAGACATAAGTTGTTCCCAACTT-GCTTCTCCTCATAAGA---AGAACTAACAACTATTGAGGGACAGGCTTCATTGAGAA-AATCCTAGA
megabat  CCTAGAATGCAGAGTCATGAAACCTACAA-----AGAGG-----CCTTATAGTT-TCTATAATTGAAATTTCTATTAGAAATCACAGAGACAAGAG-----TGACTTCACCAAGATAGTGACATCTTTGCTCCTGACCTTGTCTCCCATCACAAAG---AGAACTAACAACTATTGAGGATAAGACCCCTGAGAA-AATCCTGGA
microbat TTAGAATGCAGACTCATGAAACCTATAA-----AGTGGAGACTGATCTTGATAGTT-TCTAGGATTAGAAATTTCAATTGGAA-----TTAACATTT-----TGACTTCACCAAGATGGTGAATAGTTCACTCTGGCCTTGTCTCCCTTACAAGA---AGAACTAACAGCTATTGAGGACAAGACATCACGGAGAA-AATCCTGGA
horse    CCTAGAACACAGAGTCACAAAACTTTGA-----AGAGGCCAACGATCTTGACAGTT-TCTAGAATTAGAAATTTCTATTAGAAATCATAGAGAAAAGAG-----TGACTTCACCAAGATGGTGAATAGTTCTGTTCTTAACCTTCTCTGCCCCTCGCAAGA---ACAACCTAACAGCTATTGAGGACAAGACATCACTGAGAA-AATCATAGA
dog      CCCAGAAAT--AGTCATAAAATTTTCGGAGTTTACAGAGTTAACAGAGTTTAGTAATT-TCTAGAATTATATTCCT-----CTGTGTCACCAAGATGGTGAATAGTTCACTCTGGCCTTGTCTCCCTTACAAGA---AGAACTAACAGCTATTGAGGACAAGACATCACGGAGAA-AATCCTGGA
panda    TCTGGAATGT--AGTCATAAAATTTTCAA-----AGAAATTAACAGATTTTAAATAATT-TCTAGAATTAATAAGTTTCA-----AGAAATAGA
human    CCTGGAGTATAGAGTCATAAAATCTTTAA-----GGAGGCCAACTGATTTTGTAGTTGCTTAGAATTCGAATTTCTATTAGAAATC-----AGAAATAGA
```

```
cow      AATCACAG-AGATGACTTTTACGTTATTTTT--CCTCTGGCCTTTCCTTGTCTTTTTGTGAAATTTCTAATCATCCAGTCATCATATTTATGCCA
dolphin AATCACAG-ATACAACTTTTATGTAATCTTTT--CCTCTGACCTTTCCTTGTCTTTTTGTGAAATACACTAATCATCCTGGTCATCAAATCTTTGCCA
pig      AATCACAG-AGATAACATTTTATGTAATATTT--CCTCTGAC-----CCTTGTCTTTTTGGTGAATATACATAATCATCCTGGTCATCAAATTTTATGCCA
megabat  AATCACAG-GAATAACTTTTATGTAATTTTT--TTTCTGAC-----CCTTGTCTTTTTGAGTAAAAATACATAATCATCCTGGTCATCAAATTTTATGCCA
microbat GATCACAG-AGATCAATTTTATGTAATTTTTTCCCCCTGAC-----CCTTGGCCTTTCCTTGTCTTTTTGGTGAATTTCTAATCATCCTTGTCTCAAATTTTATGCCA
horse    AAAACACAGAAAGATACTTTCATGTAATTTGT--CCTCTGAC-----ACTTGTCTTTTTGGTGAATATACATAATCATCCTGGTCATCAAATTTTATGCCA
dog      AACCCACAG-AGATAACTTTTATGTAATTTTATT--CCTCAGAC-----CTTGTCTTTTTGGTAAAG-----ATACTAATCATCAAATTTTATGCCA
panda    AACCCACAG-ACATAACTTTTATGTAATTTTATT--GCTCAGAT-----GTTTGTCTTTTTGGTAAAA-ATATTAACTCCTTATCATCAAATTTTATGCCA
human    --CCATAG-AGATAATGTTTACATAATTTTTT--CCTCCGAT-----CATTGTCTTTTCTGTGAAATATACATAATCAACATGGTCATCAAATTTTGTGTC
```

megabat TGTGATTAGAACTTTGGTAAACATTAGAC-ATTCCTATCAATTGAAAGTTTTCT--GGGAACC-TAAACATTTTCACTTACATGTATGTAGAACCAAAAGATTTTTTCCCCCAATTTTTAGAGAAATAATGCATACAATACTA--TTTAAAGTACGGCAGTATGGTTTGTATTACACACTGTGAAATGATTGCCACAATAGGTTAGTCAACATTTACCATT  
microbat TATTATTAGAAAATTTTAAACATTAGAC-ATTCCTATCAAAATTTTCTAGTGGGAGCC-TAAACATTT-TACTACATGTGTGTGGAGCACAGGGATTTTTT--CCAAATTTTAAAGAAACAATTTGACATATACACTA--T--AAAGTTTAAAGTTACAGCATGATTATACATGTGTGAAATGGTTACCACAGATGTAGCTA----ACATCCATCT  
dog CATTATTAGAAAATTTATGACATTTGGAC-TTTCCCATATCAGTCAAAAATTTTCTACTGGGTGACTTAACTTTT-GAATATATATGTATGTAGAACTAGAAAATTTTCCCAATT--TTGAGAAATAATTTGACATTACTGTATAACTTTAAGGCATACAGCATGATGATGGATTACATGTATTATGAAATGGTTACCACAGCAGGTTTCAGATAATCCATCATG  
panda CTTTATTAGAAAATTTTGTACATTTGGAC-TTTCCCATATCAAAATTTTCTACTGGGAAAC-TAAACATTT-GGATATATATGTATGTAGAACTAGAAAATTTTCTATTATTATGAGAAATAATTTGATATTACTGTATAACTTTAAGGCATACAGCATGATGGTTGGATTACATGTATTATGAAATGGTTGCCACAGTAGGTTAGTCAACATCCATCATG  
cow TGTATTAGAAAATTTTAAACATTAGAT-ATTCCTGTATCAAAATTTTCTACTGGGAGCC-TAAACATTT-TAATATACATATAGAG-----  
alpaca TGTATTAGAAAATTTTAAACATTAGAC-ATTCCTGTATCAAAATTTTCTACTGGGAGCC-TAAACATTT-TAATATACATATAGAG-----  
dolphins TGTATTAGAAAATTTTCAACATTAGAC-ATTCCTATCAAAATTTTCTACTGGGAGCC-TAAACATTT-CAATGACGTATGTAG-----  
horse TGTTAATAGAAAATTTTGTACATTTAGAC-ATTCCTATCAAAATTTTCTACTGGGAGCC-TAGCATTTCCAAGTACATGTGTGTGG-----  
hedhehog TATTATTAGAAATTT--ATTAGAC-ATTTTCCACTTGAATTTAAAATATCAGATGGGTC-TGATA-----GTGTGTGTAG-----  
human TGCCATTAGAAAATTTGTAATATAAAC-ATTCCTATACCAAATTTAAAATTTTACTGGGAGCC-TATTATTT-CAATATATGTGTGTAG-----

megabat TTTGTATAGATGCAATAGAAAAGAACG-----AAAAAAATTTTTTTCTCCTTTTGATGAGAATCTTAGGAATTTACTCAC-----  
microbat TCTCAGAGATACATGAAAAGAAAAG-----GAAAAAAATTTTTTTCTCCTTTGATGAGAATCTTAGGAATTTACTCAC-----  
dog TCATATGGATACAGTAAACAGAAAAG-----AAAAAAGCTTTCCTTGTGATGAGAATCTTAGGAATTTACTCAC-----AACTTTTTTTTTTGTAGAGAGAGGGGTGGGGTTGAGGAACAGAGGGGAAAGGAGAAAGAAATCCATCCTAAGCAAGCTCCACACCCAGCACGGAGGCCAGTGGGGGCTTGATCTCAAAA  
panda TCAAAATGGATACAGTAAACAGAAAAGAGAAAAGAAAAAGAAAAGTTTTTCCTTGTGATGAGAATCTTAGGAATTTGTTCTTAACTTTCTTTTTCTTTCTTTTTTTTTTTAGAGAGAGGGGTGGGGTTGAGGAACAGAGGGGAGGGAGAGAGAGA---AATCTAAGCAGGGCTCCACGCCAGTGTGGAGGCCACTGTGGGGCTTGATTTCAAAA  
cow -----  
alpaca -----  
dolphins -----  
horse -----  
hedhehog -----  
human -----

megabat -----TTAACTTTTCTGTATATCATATGGCAATGTTAACTGTAGTTATCATGCTGTACGTTATATCTTTAGTACTTTTTTCTTCAACTGAAAAGTTGTACCTTTTGACCACCTTCTCCAAA-TTCTCCCACCCTCAAACCTTACCACCTCTGGTAACAA  
microbat -----TTAACTTTTCTGTATATCATACAGCAGTGTAACTATATAGTTACCATATGTACATACACCCCTAGTACTTATTTCTGTATAACTAGAAAG-----TTTGTATCACTAAATGCCAA-TTTTCATCTCCTTACCTCTCCGTCGCCCTCAACCA  
dog CCCTGAGATCATGACCTGTGCCATGTC--AAGAGTGCAGATGCTCAGCTGAGCCACCCAGGCCCTCTAACTTTCATTATATCAAGAAAAGCAAGTGTAGCTGTAGTGCATCAGGTTGTACATTTGCATCCCTAGACTTATTTGCTTATGATTTGGACAATTTTACCTTTTGTCTTCTTATTTCCCCTCTTCCACCTCTGGTCACTCTGTAATCA  
panda TCCTGAGATCACAACTGAGCCGAAAACAAGAGACACGCTCAACCAACTGAGCCACCCAGTCGCCCTCTTAACTCCTTGTATACACACACAGCAGTGTAGCTATAGTGCATGAGGTTGTACATTTGATTTCTTGTACGTTATTTCTTATACCTGGAAGTTCGTACCTTTTGTATACCTTCTTTTTC-TCCCCTCTCTCCACCTCTGGCCCTCTGGTAACCA  
cow -----  
alpaca -----  
dolphins -----  
horse -----  
hedhehog -----  
human -----

megabat CAAGTCTGATCTCTTTTCTGAGGTTTTGTTT-----TGTTTTGTTTTTTTAAAGTTCTACATATAAGTGAGATCATCAAGTATTTGTTTTCTTGTCTGACTTATCCACTTAGCATG-----TCTTACGGTCTCCGCAATTTGCAAAATGGTTGAATCCCTCATTTTT-----TATTTGGCTAAAAATATTCCATTGATTTA  
microbat CAAGTCTGACTCTT-----TCTGAGT-----CTGGGTTTTGTTTTAAGAATCCACAATAAAGTAAGATCAACAATATTTGTTTTCTCTGTTGACTTATCCACTTAGCATAAATCTTTAAGGCCCACTGTTGTGTGCACAGTGGTGGGAATTTCTAATTTTCTATCTGGCTGAATAGTACTG-----CGTTTTAATTGG  
dog CAAGTCTGATCTCTTTTCTGGGTTTTGGTTTTGGTTTTGA---TTATTTTTGTGTATTTCTTCCCTGATATAAAGTAGATCCTACAGTATTTGTTTTCTGTATATGACTTATTTCACTTAAACATAAGCTCTCAAGATCCATCTGTGTATTCTCAAAATTTAGGAATTCCTCATGTTTTTATGTCTGAGTAAATGATGATATAAATAAATATACATGACACA  
panda CAAGTCTGATCTCTTTTCTGGGTTTTGGTTTTGGTTTTGGTTTTAAATTTCTTTTTTTTTAAATTTCTGCTGTAAAGTAGATCCTACAGTATTTGTTTTCTGTGTATGACTTATTTCACTTAGCATAAATGCCCTCAAGCTCCATATGTGTTATCTCAAAATGTTAGGATTTCCCTCATGTTTTTATGTCTGAGTAAATGATGATATAAATAAATATACATGACACA  
cow -----  
alpaca -----  
dolphins -----  
horse -----  
hedhehog -----  
human -----

megabat CATACCACAACTCAGTGGACAC-----AGGTTGTTTCCATGTCTGGCTATTGTAAATAATGCAGCTATGAACTAAAGATGCAGATATCTTTTCAAGTTAGCAACACTAAAGATTTTGTGAATAAGGCTATTCCAGGTAAAAGGAAATCTGAAGCAAAAAGTAACAAAAGGCTAGAGTCTGGGACTGTGAGAAAGAC-AT-GAGGCAT  
microbat TGGACCACAA---TTCATCCATTCATCTCATCCATGGACAGTGGGTTTTTCCATGTCT---ATTGTAATAAATGCTGTATGAACTGAGGGTGAG-----GACACTAGGA-TTTGATGGATGAGGTTATTCCAGGTTAAAAGGAACTGAAGCAAA-----GGTGTAGAGTTACAGGCATGTTAGAGGC-AG-GAGCCAT  
dog CATTGCCACAACTCTTTATCCGTTATCCATCCATCCATGGACACTTAGATTGTTTTATGTTG---ACTATACATAAATGCTGCTATGAACTGAGGGTCAGATACTTTTCAAGTT---AGCACTAGGATTT---GATAAGGCTATTCCACATAAAACGATACTATAGCAAAAAG--TGCAAAAATCCAGAGTTCTAGTACATGATAGAGGACTGGTCAGCCAT  
panda CACCACCAA---CTTTATCCATTCATCCATCAGTGGACACTTAGGTTTTTCTGTGTCTTTGGCTGCTGATGAACTGAGGTTGCTGCTATGAACTGAGGGTACAGATACTTTTCAAGTTAGAAACACTAGGATTTTGATGATAAGGCAATTCTGGGTTAAAAGGAAATCTAAAACAAAAAGAAATGCCAAAATCT--AGTTATAGGCCATGATAGAGGACTGATGAGCCAT  
cow -----AACACTAGGAATTTTATGGATAAGACTGTTCCAGGTTAAAAGGAAATCTGATGCAAAAAGAAAGTCCAAAGGTTCTCGAGTTGCAGGACATTTGATAGATTT--GGTAAGCTGT  
alpaca AGCACTAGGATTTTATAGATAAGACTATTTAGGTTAAAAGGAAATCTGATGCAAAAAGAAAGTCCAAAGGTTCTAGAGTTGGAGGACGTTTTAGACACC-ACTGAGCCAT  
dolphins AACACTAGGATTTTATGGATAAGACT---TTCATGTAAAAGGAAATCTGACGCAAAAAGAAAGTCCAAAGGTTCTAGAGTTGCAGGACATTTTGAAGACT--GGTAGCCGT  
horse AACACTAGGACTTTGATGGATCAGGCTGCTCCA-GTAGAAAGAAATCTGGAGGGGAAAGGAGGAGAAAGGCTAGAGCTGCAGGACATGTTAGAGGAT--GG-GAGCCGT  
hedhehog AACACTAGGATTTTATGATGAGTAAGGCTATTTCTGGGCAAGTGAATACCGAAAATAAAAGAAAGTCAAAAAGGCTGGGGTTGCAGG-----TAGTGGAT--GGAAAATC--  
human ATCCCTAAGGTTTTGGGGGTAAGTCAATCCAGGTAAGA-GCACACTGAAGCAAAAAGAAATCAAAAAGGTTTAGAGTTGCAGGATTTGTTAGAAAGACTGTTGAGACAT

megabat CTTTTCATCTCTATTTGCTCATGGTTCTTTTCCACAGAG  
microbat CTTTTCATCTCTGTCTTTCTATGGTGCCTTTCCACAGAG  
dog CTTTGCATCTC--TATTCCCTCATGGTACTTTTCAATAGAG  
panda CTTTGCATCTCTTATTCCCTCATGGTACCCTTTCAAAGAG  
cow CTTTACC--TGTTTTCTCATGTTCGCTTTCAATAGTG  
alpaca CTTTACCCTC--TGTTCCCTCAGGGTGCTTTCCACAGTG  
dolphins CTTTTCATCTC--TGTTCCCTCATGGTGCCTTTCAATAGCG  
horse CTTTTCATCTC--TGCTCCTCATGGTGCCTTTCCACAGAG  
hedhehog TTTTGCATCTCCATCTTGTCTGAGGCCACTTGCAGAT  
human TTTTTATCTTTGCTCCTCATGGTGCCTTTCCACAGAG
